# 1 **Temporally and Spatially Regulated Collagen XVIII Isoforms Impact** 2 **Ureteric Patterning Through Their TSP1-like Domain**

3

4 Mia M. Rinta-Jaskari<sup>1</sup>, Florence Naillat<sup>1</sup>, Heli J. Ruotsalainen<sup>1</sup>, Saad U. Akram<sup>2</sup>, Jarkko T. Koivunen<sup>1</sup>, Valerio  
5 Izzi<sup>1</sup>, Veli-Pekka Ronkainen<sup>5</sup>, Takako Sasaki<sup>3</sup>, Ilkka Pietilä<sup>1, 4</sup>, Harri P. Elamaa<sup>1</sup>, Inderjeet Kaur<sup>1</sup>, Aki  
6 Manninen<sup>1</sup>, Seppo J. Vainio<sup>1, 6</sup> & Taina A. Pihlajaniemi<sup>1\*</sup>

7 <sup>1</sup>Oulu Center of Cell-Matrix Research, Biocenter Oulu, Faculty of Biochemistry and Molecular Medicine, University  
8 of Oulu, Finland; <sup>2</sup>Center for Machine Vision and Signal Analysis (CMVS), University of Oulu, Finland;  
9 <sup>3</sup>Department of Biochemistry II, Faculty of Medicine, Oita University, Japan; <sup>4</sup>currently: PEDEGO Research Unit  
10 and Medical Research Centre Oulu, University of Oulu and Oulu University Hospital, Finland; <sup>5</sup>Biocenter Oulu,  
11 University of Oulu, Finland, <sup>6</sup> InfoTech Oulu; Borealis Biobank of Northern Finland, Oulu University Hospital

12 Running Title: ColXVIII in kidney development

13 \*Author for correspondence: Taina Pihlajaniemi, Faculty of Biochemistry and Molecular Medicine,  
14 University of Oulu, Aapistie 7, 90230 Oulu, Finland. E-mail: [taina.pihlajaniemi@oulu.fi](mailto:taina.pihlajaniemi@oulu.fi)

15 Key words: Collagen 18, nephron progenitor cell, kidney development, branching, integrin  $\alpha 3\beta 1$

16 **ABSTRACT**

17 Collagen XVIII (ColXVIII) is a component of the extracellular matrix implicated in embryogenesis and control  
18 of homeostasis. We provide evidence that ColXVIII has a specific role in kidney ontogenesis by regulating the  
19 interaction between mesenchymal and epithelial tissues as observed in analyses of total and isoform-specific  
20 knockout embryos, mice, and *ex vivo* organ primordia. ColXVIII deficiency, both temporally and spatially,  
21 impacts the 3D pattern of ureteric tree branching morphogenesis *via* its specific isoforms. Proper development  
22 of ureteric tree depends on a tight control of the nephron progenitor cells (NPCs). ColXVIII-deficient NPCs  
23 are leaving the NPC pool faster than in controls. Moreover, the data suggests that ColXVIII mediates the  
24 kidney epithelial tree patterning *via* its N-terminal domains, and especially the Thrombospondin-1-like  
25 domain, and that this morphogenetic effect involves ureteric epithelial integrins. Altogether, the results propose  
26 a significant role for ColXVIII in a complex signalling network regulating renal progenitors and kidney  
27 development.

## 28 INTRODUCTION

29 The extracellular matrix (ECM) plays a critical role in embryonic development as well as in maintaining organ  
30 homeostasis and regulating stem cell fate (Andrew & Ewald, 2010; Lu, Takai, Weaver, & Werb, 2011; Lu,  
31 Weaver, & Werb, 2012). The ECM consists of two major compartments, namely the interstitial matrix and  
32 the basement membranes (BM) (Andrew & Ewald, 2010; Lu et al., 2011; Lu et al., 2012). Collagen XVIII  
33 (ColXVIII) specifically occurs at the BMs and exerts its function *via* three isoforms, and it also serves as a  
34 heparan sulphate proteoglycan. The isoforms differ in size and are established on account of two promoters  
35 and alternative splicing (Halfter, Dong, Schurer, & Cole, 1998; Muragaki et al., 1995; Rehn & Pihlajaniemi,  
36 1994; Rehn, Hintikka, & Pihlajaniemi, 1996). All isoforms contain a common collagenous portion, a C-  
37 terminal domain containing endostatin, and an N-terminal thrombospondin-1 (TSP1)-like domain. The so  
38 called medium and long isoforms have an N-terminal mucin-like domain (MUCL-C18) that is flanked in the  
39 long form by a Frizzled-like domain which is involved in control of Wnt signalling (Fig. 1) (Kaur et al., 2018;  
40 Muragaki et al., 1995; O'Reilly et al., 1997; Saarela, J., Ylikärppä, Rehn, Purmonen, & Pihlajaniemi, 1998).

41 In humans, the lack of ColXVIII results in Knobloch syndrome, which is characterised by eye abnormalities  
42 and an occipital encephalocele (Caglayan et al., 2014; Passos-Bueno et al., 2006). In addition, other symptoms,  
43 including kidney abnormalities, have been described in these patients (Bishop et al., 2010; Passos-Bueno et  
44 al., 2006; Seppinen & Pihlajaniemi, 2011; Sertié et al., 1996), in line with the phenotypes noted in the  
45 ColXVIII-deficient mice (Aikio et al., 2013; Aikio et al., 2014; Bishop et al., 2010; Kinnunen et al., 2011;  
46 Olsen et al., 2002; Utriainen et al., 2004).

47 In the adult mouse kidney, all three ColXVIII isoforms are expressed, but their localisations differ. The short  
48 form is expressed in the tubular BMs, the Bowman's capsule and the glomerular endothelial BM, whereas the  
49 other two localise to the BM of the podocytes, the mesangium and the BM of the kidney vessels (Elamaa,  
50 Snellman, Rehn, Autio-Harmainen, & Pihlajaniemi, 2003; Kinnunen et al., 2011; Muragaki et al., 1995;  
51 Saarela, J. et al., 1998; Saarela, J., Rehn, Oikarinen, Autio-Harmainen, & Pihlajaniemi, 1998).

52 With regards of developing mammalian kidney ColXVIII is present in the ureter bud (UB) from E10.5 onwards  
53 when the bud goes on to invade the predetermined and committed metanephric mesenchyme (MM) containing

54 the nephron precursor cells (NPCs). ColXVIII has been speculated to have a role in the UB to respond to the  
55 mesenchymal signals that control the UB bifurcation during ontogenesis (Karihaloo et al., 2001; Lin et al.,  
56 2001).

57 To target the roles of type XVIII collagen in detail the expression patterns of its three isoforms during renal  
58 development were characterised, and sophisticated *ex vivo* and *in vivo* experiments were implemented for  
59 better understanding of ColXVIII function in the embryonic kidneys. For these purposes, ColXVIII total and  
60 isoform specific knockout embryos and mice (Fig. 1) were used. We now provide evidence that ColXVIII  
61 knockout impacts greatly the UB branching process and concurrently reduces the NPC population. This study  
62 is the first to describe a role for the non-collagenous N-terminal domain of ColXVIII in renal development  
63 where it rescues the noted epithelial malformations in UB. Our study points to a role of the TSP1-like domain  
64 of ColXVIII in regulating the UB branching, a process potentially mediated by integrins.

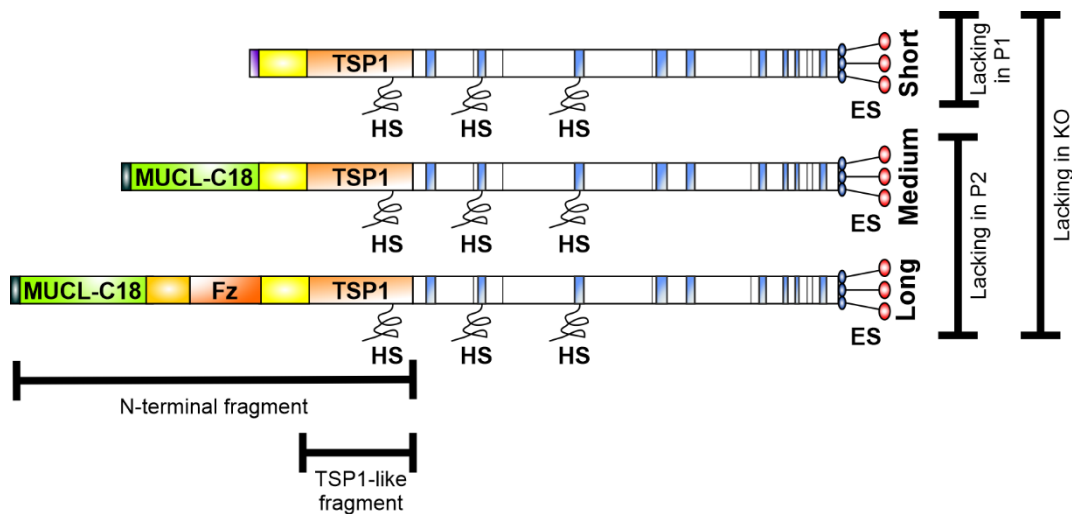

**Figure 1. Schematic picture of the structure of ColXVIII and mouse lines used in the study.** All three isoforms have a common collagenous domain, C-terminal endostatin domain (ES) and N-terminal TSP1-like domain (TSP1). In addition, the medium and long isoforms have MUCL-C18 domain in the N-terminus, but only the longest isoform has also the N-terminal Frizzled-domain (Fz). The total ColXVIII KO mice lack all three isoforms, whereas the P1 mice lack only the short isoform and the P2 mice lack only the two longer isoforms. The picture also shows the N-terminal fragment and the TSP1-like fragment used in the kidney organ culture studies. HS = heparan sulphate side chain.

## 65 **RESULTS**

### 66 **Only the short ColXVIII isoform is expressed during the early phase of kidney development, whereas** 67 **the expression of the two longer forms is detected in more mature structures**

68 While it has been shown that the different ColXVIII isoforms have specific locations in adult mice and human  
69 as well as human fetal kidneys (Kinnunen et al., 2011; Saarela, J. et al., 1998), the isoforms' temporal  
70 expression patterns during renal organogenesis have been unknown. Thus, the RNA expression of ColXVIII  
71 and its different isoforms was analysed by qPCR from separated MM and UB of the isoform specific ColXVIII  
72 knockout embryos lacking either the short isoform (P1) or the two longer isoforms (P2) and ColXVIII total  
73 knockout (KO) embryos at E11.5. Two sets of primers were used to ascertain the expression patterns, those  
74 directed against the endostatin domain common to all isoforms and those specific to the short isoform. With  
75 the endostatin primers, ColXVIII expression was detected both in the MM and the UB of WT and P2 kidneys  
76 (Fig. 2a,b), while this expression was lacking in the KO and P1 kidneys (Fig. 2a,b). This expression pattern  
77 was confirmed with the short isoform-specific primers (Fig. 2c,d). The results of the qPCR analyses indicate  
78 that only the short ColXVIII isoform is expressed in both the MM and UB and that there is no expression of  
79 the two longer forms during this early phase of development.

80 To visualise the expression of the ColXVIII in the different knockout mice, the whole-mount *in situ*  
81 hybridisation of WT and ColXVIII mutant kidneys was carried out that revealed a well-regulated expression  
82 of ColXVIII isoforms. At E12.5, the ColXVIII expression was detected in the epithelium of the ureter  
83 extending through the kidney in both the WT and the P2 kidneys expressing the short form, while in the P1  
84 kidneys expressing the medium and long forms, the expression was only detectable in the ureteric stalk area  
85 (Fig. 2 – figure supplement 1a). At E13.5 (Fig. 2 – figure supplement 1b) and E14.5 (Fig. 2e – figure  
86 supplement 1c) the P1 kidneys expressing only the two longer isoforms had a less positive signal in the cortex  
87 compared with the WT and P2 kidneys expressing the short isoform. Furthermore, at E16.5, the P1 kidneys  
88 expressing only the two longer isoforms were devoid of a ColXVIII expression on the surface of the organ,  
89 similarly to the KO kidneys, whereas WT and P2 kidneys expressing the short isoform showed a strong  
90 ColXVIII expression in the ureter tips (Fig. 2f).

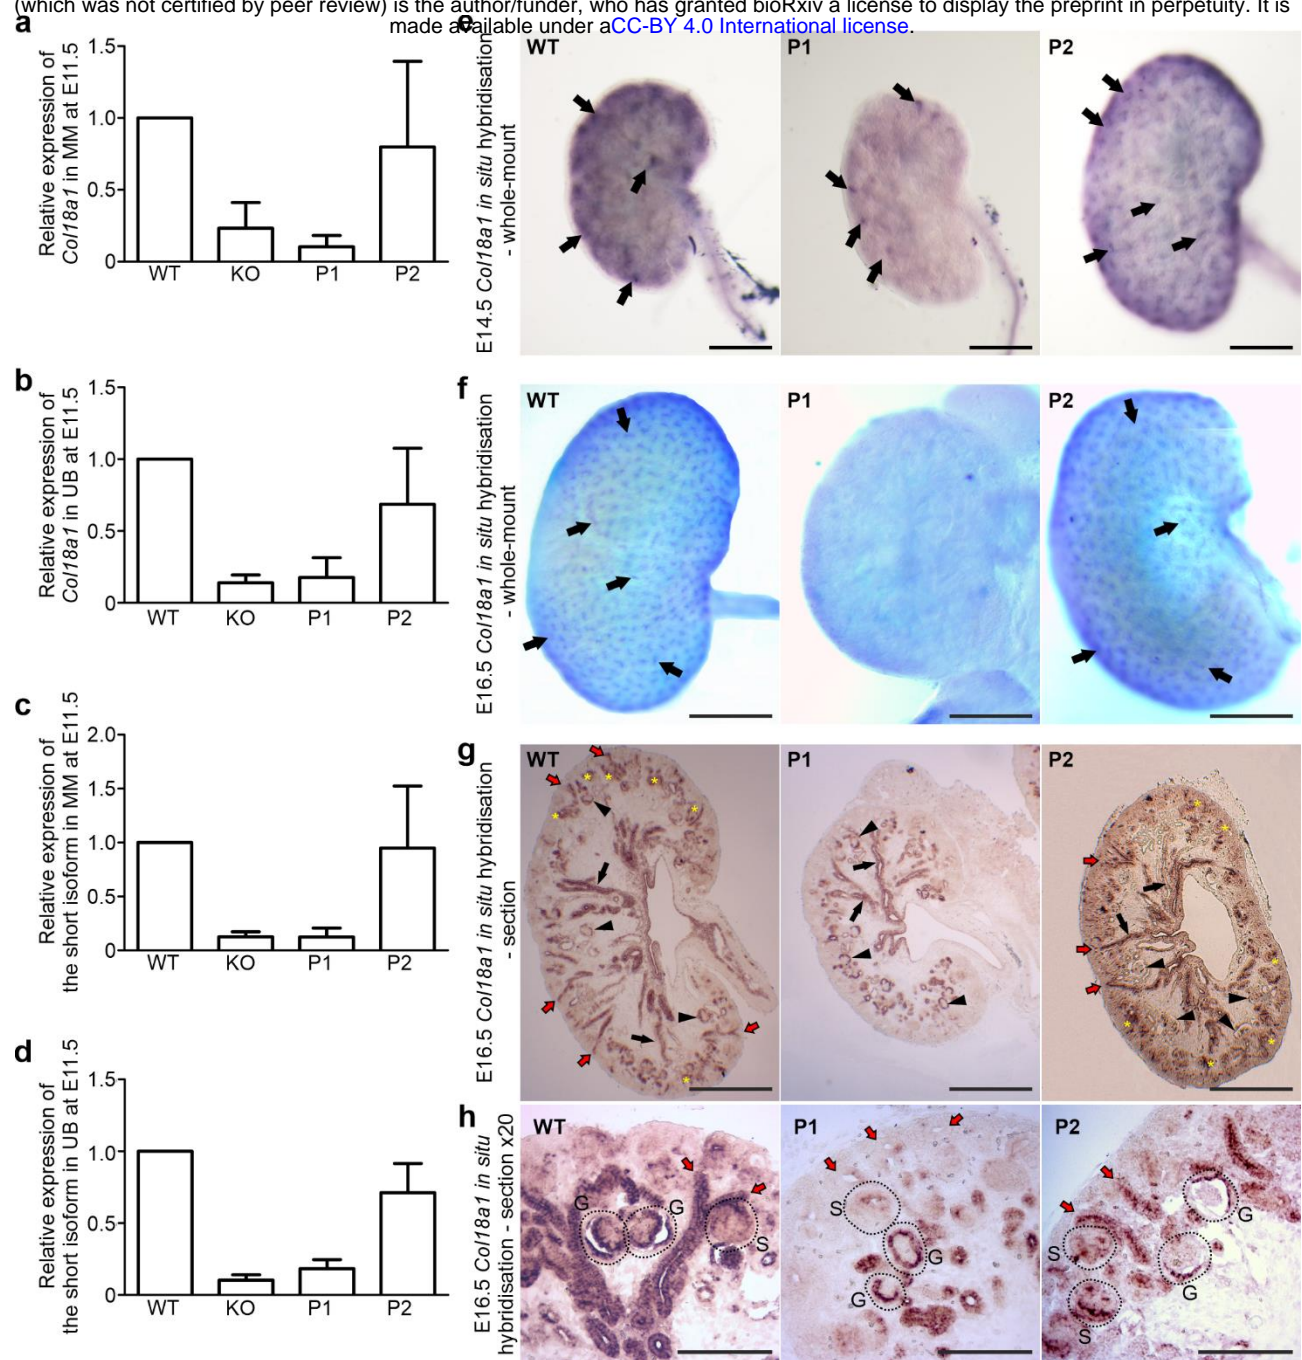

**Figure 2. Only the short ColXVIII isoform was expressed during the early stages of kidney development and in the developing structures.** The qPCR analyses of separated (a) metanephric mesenchyme (MM) and (b) ureteric bud (UB) at E11.5 using primers from the common endostatin domain of ColXVIII were conducted. The expression of only the short form in the (c) MM and the (d) UB at E11.5 was confirmed with qPCR using specific primer for the short ColXVIII form in KO, P1, and P2; n(WT)=20, n(KO)=18, n(P1)=14, and n(P2)=22 pooled samples. Whole-mount in situ hybridisation of (e) E14.5 (bar: 500  $\mu$ m) and (f) E16.5 (bar: 500  $\mu$ m) WT, P1, and P2 kidneys with an antisense ColXVIII RNA probe. Arrows indicate the ColXVIII-positive structures. (g) Section in situ hybridisations of E16.5 WT, P1, and P2 kidneys for ColXVIII expression (bar: 500  $\mu$ m) and magnifications of the E16.5 section in situ hybridisations (h) (bar: 100  $\mu$ m). In (g) black arrowheads indicate ColXVIII-positive glomeruli, black arrows indicate collecting ducts, red arrows indicate branching tubules, and yellow stars indicate ColXVIII-positive comma- and S-shape bodies. In (h), red arrows indicate branching tubules, and dashed areas indicate glomeruli (G) and S-shape bodies (S). In graphs, columns indicate mean $\pm$ s.d.



92 The section *in situ* hybridisation of E14.5 (Fig. 2 – figure supplement 1d) and E16.5 (Fig. 2g,h) kidneys  
93 revealed at both time points positive ColXVIII expression throughout the cortex in the WT and P2 kidneys  
94 expressing only the short isoform, including the mature collecting ducts and glomeruli, as well as the  
95 glomerular precursors and branching tubules in the nephrogenic zone. In contrast, in the P1 kidneys lacking  
96 the short isoform ColXVIII was expressed only in the mature glomeruli and tubules, but the developing  
97 structures in the nephrogenic zone were devoid of ColXVIII expression (Fig. 2g,h – figure supplement 1d).  
98 ColXVIII immunostaining of E14.5 (Fig. 3) kidney sections confirmed these differences in the isoforms’  
99 expression patterns and clearly indicated that only the short ColXVIII isoform is expressed in the BMs of renal  
100 vesicles and comma- and S-shape bodies, as well as in the BMs around the ureteric tips separating ureteric tip  
101 cells and NPCs. Moreover, these studies revealed that the isoforms have different localisations in the mature  
102 glomeruli: the longer ColXVIII variants were expressed by the podocytes and the short variant localised to the  
103 Bowman’s capsule, especially to the layer of parietal epithelial cells, in addition to the glomerular BM (Fig.  
104 3d). In conclusion, the short ColXVIII isoform is the only form expressed in the early phases of renal  
105 development, in the ureteric tips and stalks as well as in all stages of the nephron development while the two  
106 longer forms are expressed only later in development in the ureteric stalks and in the nephrons which have  
107 passed the S-phase.

108

### 109 **Lack of ColXVIII reduces the number of the NPCs in the nephrogenic niches**

110 ColXVIII is involved in the control of the survival and proliferation of stem cells during adipogenesis in adult  
111 mice and such result raised the possibility that similar behavior might be observed in the embryonic kidneys  
112 in NPCs (Aikio et al., 2014). We first tested the hypothesis that ColXVIII would have a role in these cells by  
113 lineage tracing of Wnt4 positive cells and using live microscopy to investigate NPC behaviour. Wnt4 is one  
114 of the earliest known markers of progenitor commitment and most of the NPCs that express Wnt4 commit to  
115 nephron formation (Lawlor et al., 2019). The *Wnt4<sup>Cre</sup>*, *Rosa<sup>LacZ</sup>*, and *Rosa<sup>YFP</sup>* transgenic mouse lines were  
116 crossed with the *Col18a1<sup>-/-</sup>* (KO) background to follow the behaviour of the Wnt4+ committed NPCs in the  
117 ColXVIII-deficient fetuses.

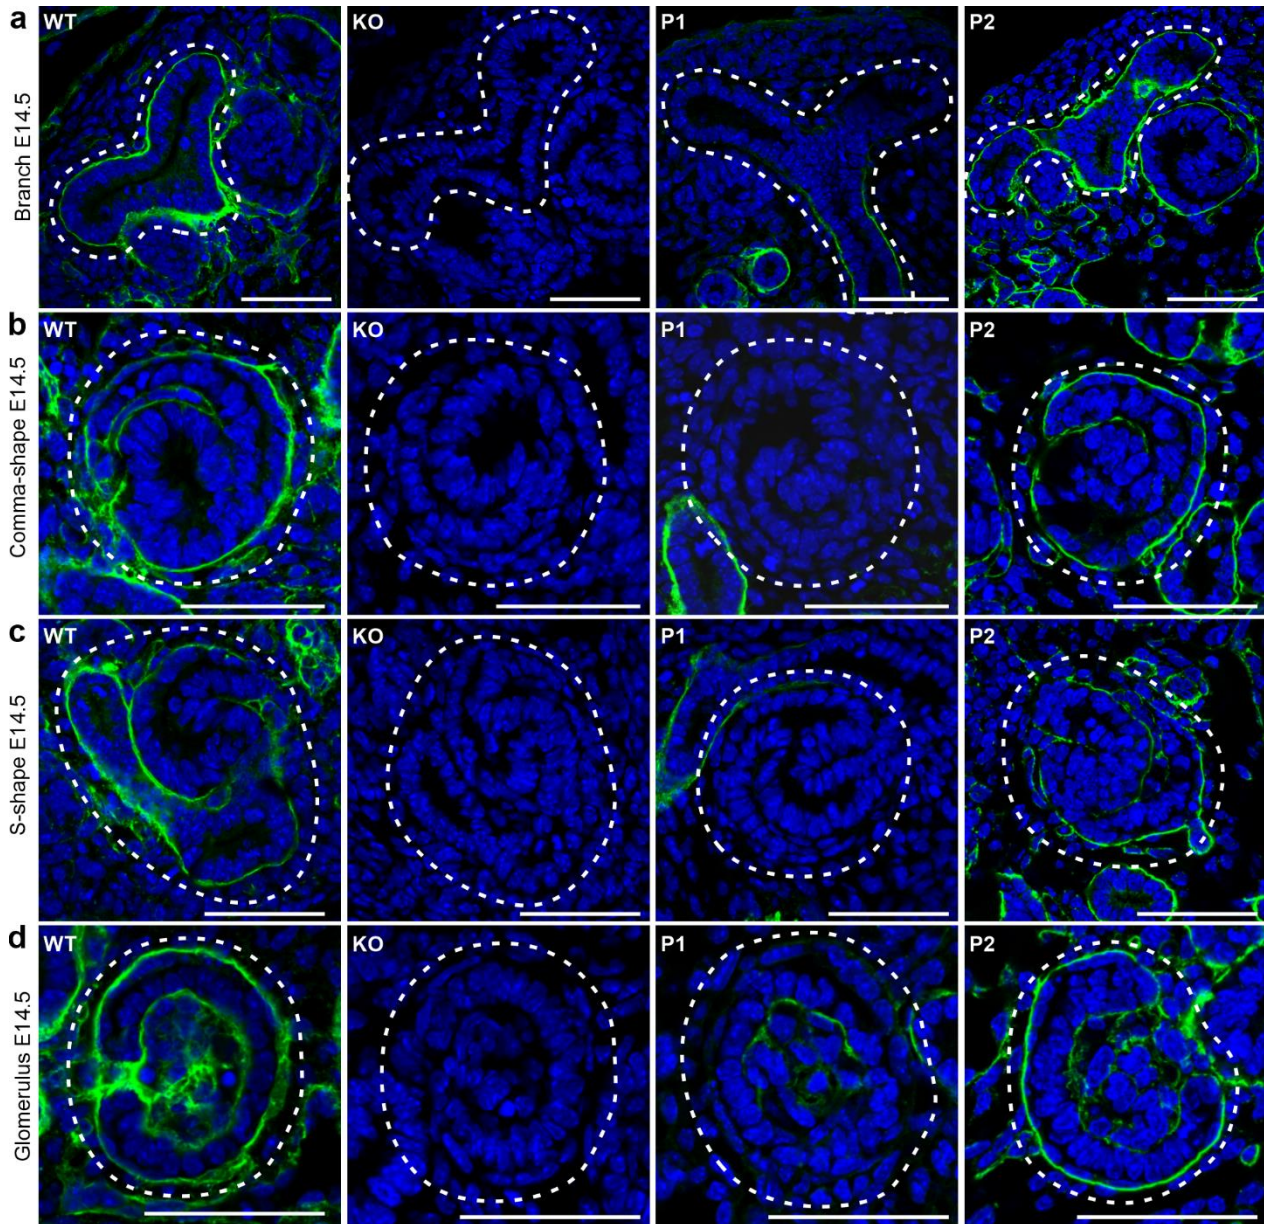

**Figure 3. The short form of ColXVIII was the main form expressed in the developing renal structures, and the different ColXVIII isoforms had different localisations in mature glomeruli.** Immunostaining for ColXVIII expression in E14.5 kidneys of WT, ColXVIII KO, and P1 and P2 promoter-specific ColXVIII mutant mice. (a) tips of the branching tubules, (b) comma-shape bodies, (c) S-shape bodies of developing glomeruli, and (d) more mature glomeruli. Note that the ColXVIII expression is detected throughout the BM of the ureteric tips in WT and P2 mice expressing the short isoform, where the BM lines both NPCs and ureteric tip cells. Dashed areas indicate the corresponding structures. Bar: 50  $\mu$ m.



119 In early kidney development at E11.5 and in the absence of ColXVIII, the Wnt4<sup>+</sup> cells were visualized first  
120 by  $\beta$ -galactosidase staining. At this time point, the Wnt4<sup>+</sup> cells in the *Wnt4<sup>Cre</sup>; Rosa<sup>LacZ</sup>; Col18a1<sup>+/+</sup>* (WT)  
121 embryos were noted to be near the metanephric kidney, but in the absence of ColXVIII LacZ-positive cells  
122 localised only to the dorsal portion of the mesonephros/gonad primordia (Fig. 4). ColXVIII deficiency thus  
123 delayed the appearance of the Wnt4 signal in the area of the metanephric region at the initiation of renal  
124 organogenesis.

125 We then prepared the *Rosa<sup>YFP</sup>; Wnt4<sup>Cre</sup>*-positive E10.5 aorta-gonad-mesonephros (AGMs) from WT (Fig. 5a,  
126 b) and KO (Fig. 5c,d) embryos and set these explants to time-lapse imaging culture for at least 38 hours. In  
127 this setting, in the WT embryonic AGMs the Wnt4<sup>+</sup> cells were detected in the MM by 5–34 h (mean 24 h),  
128 whereas in the KO primordia, such cells were noted by 17–46 h (mean 30.44 h) (Fig. 5e, Movie 1 and 2)  
129 suggesting a delay in propagation of the Wnt4<sup>+</sup> cells during emergence of the early tubular network.

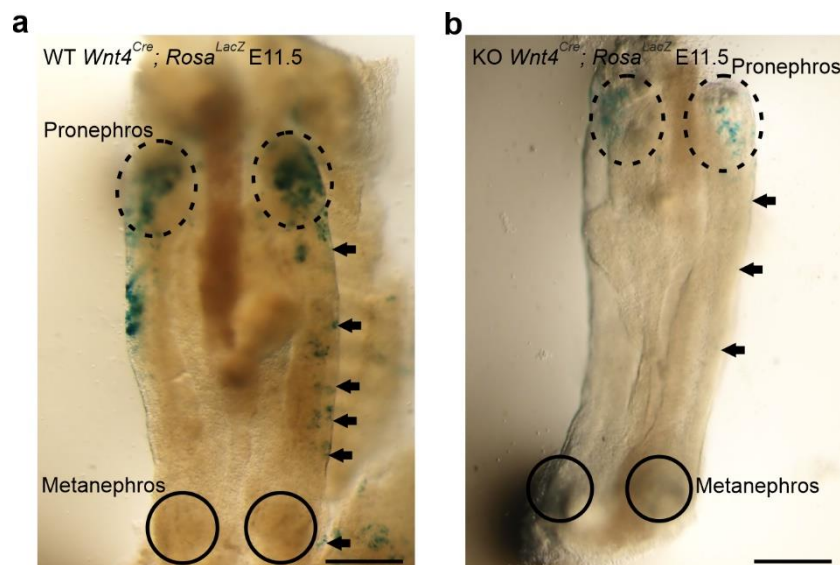

**Figure 4. The appearance of Wnt4-positive NPCs was delayed in ColXVIII KO embryos at E11.5.** (a) Whole-mount WT AGM of *Wnt4<sup>Cre</sup>; Rosa<sup>LacZ</sup>* transgenic mice was stained with LacZ (blue color) to visualise Wnt-positive (Wnt4<sup>+</sup>) cells. The Wnt4<sup>+</sup> cells were seen throughout the gonad, including the area next to the forming kidney. (b) Only one Wnt4<sup>+</sup> cell was detected in the middle of the mesonephros of E11.5 ColXVIII KO AGM, and no positive cells were seen in the developing kidney area or near it. Arrows indicate Wnt4<sup>+</sup> cells localisation on the gonad-mesonephros-metanephros area. Circles indicate the areas where the kidneys are forming. Dashed circles indicate the pronephric area. Bars: 500  $\mu$ m.

130 The *Wnt4*<sup>+</sup> cells at E11.5 and E13.5 in the *Rosa*<sup>YFP</sup>; *Wnt4*<sup>Cre</sup>-positive WT and KO kidney sections were stained  
131 for yellow fluorescence protein (YFP), *Sine oculis*-related homeobox 2 (*Six2*), a marker of NPCs in the cap  
132 mesenchyme (CM) (Kobayashi et al., 2008; Oliver et al., 2006), and ColXVIII to assay putative changes in  
133 the NPCs. At E11.5 only few *Wnt4*<sup>+</sup> cells were depicted in the WT and the ColXVIII-deficient kidney  
134 rudiments (Fig. 6 – figure supplement 1), but at E13.5, in the *Six2*<sup>+</sup> cell CM population the *Wnt4*<sup>Cre</sup> derived  
135 floxed YFP signal was clearly detected in close proximity of the UB tip region in the NPCs in both genotypes  
136 (Fig. 6).

137 Since the data suggested that ColXVIII may impact the NPCs and that its expression was found in the ureteric  
138 tip BMs lining the NPC population, we went on to later developmental stages and stained the E15.5 kidneys  
139 as whole-mount with the NPC biomarker *Six2* and the tubular epithelial marker TROMA-1 (Keratin-8)  
140 (Djudjaj et al., 2016; Skinnider et al., 2005). From multiphoton microscope imaged kidneys, each ureteric tip-  
141 cap domain, indicating individual nephrogenic niches, were separately analysed (Fig. 5f, Movie 3). This  
142 revealed that in the KO embryonic kidneys and those that lack specifically the short (P1) ColXVIII isoform,  
143 or alternatively the two longer ColXVIII isoforms (P2) all had less *Six2*<sup>+</sup> cells in foci of nephrogenic niches  
144 when compared with WT embryos (27%, 36% and 34% less, respectively, Fig. 5g).

145 Since we found fewer *Six2*<sup>+</sup> NPCs in all ColXVIII mutant mice at E15.5, we studied also the earlier  
146 developmental stage (E13.5) aiming to define the initial signs of deficiencies in null ColXVIII embryonic  
147 kidneys (Fig. 5h). Indeed, the NPC amount as judged by *Six2*<sup>+</sup> NPCs had decreased by 39% in the E13.5 KO  
148 kidneys when compared with the WTs (Fig. 5i). The results depicted that the *Six2*<sup>+</sup> NPCs are decreased in the  
149 ColXVIII null embryonic kidneys at E13.5 onwards, as was the case for the isoform specific ColXVIII mutants  
150 at E15.5.

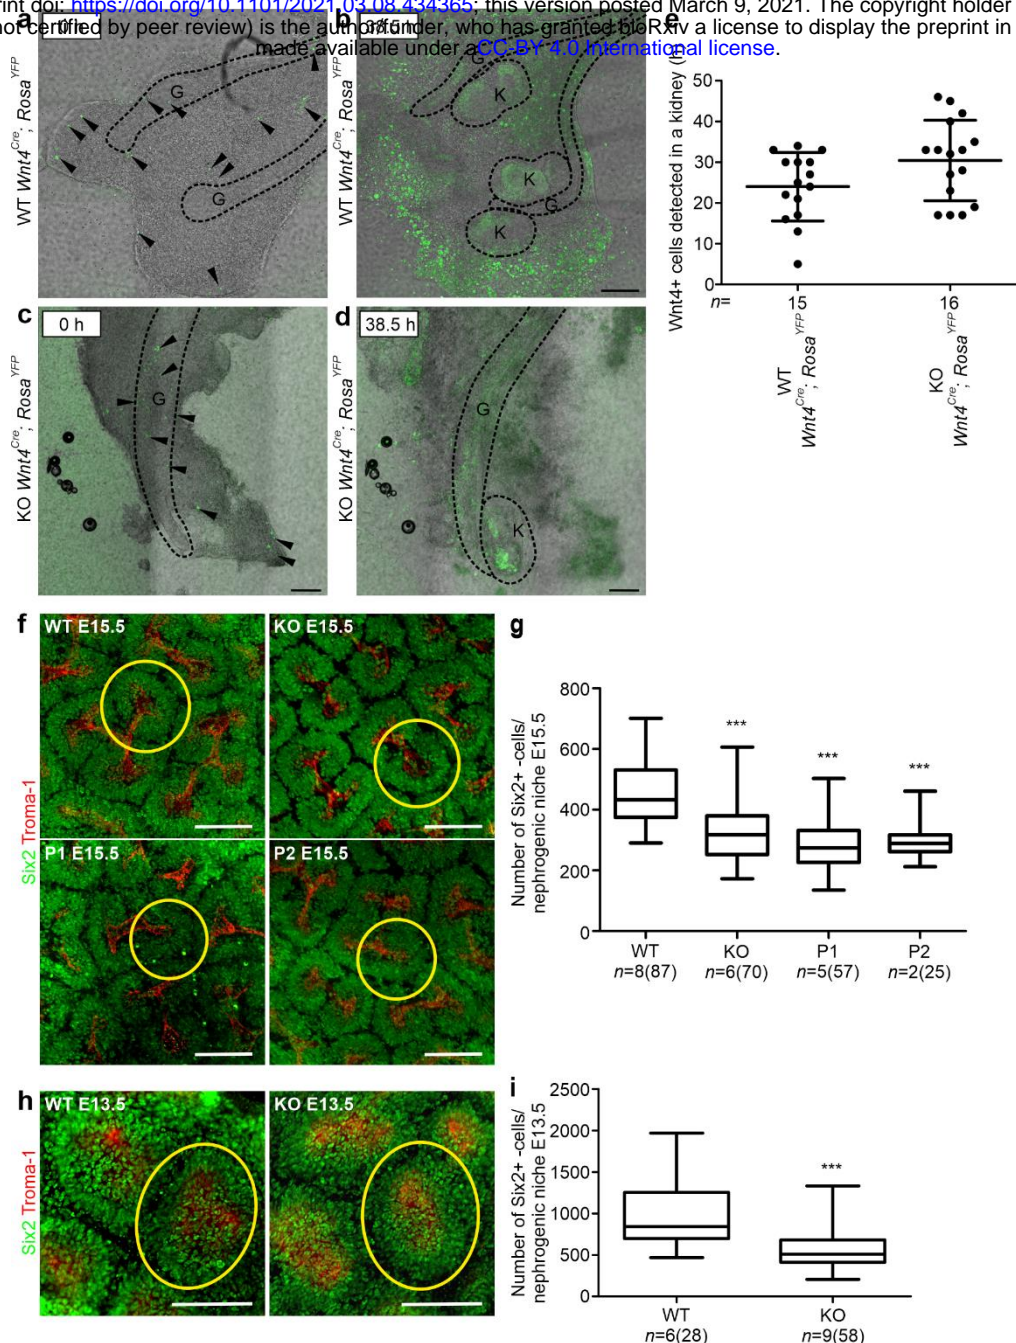



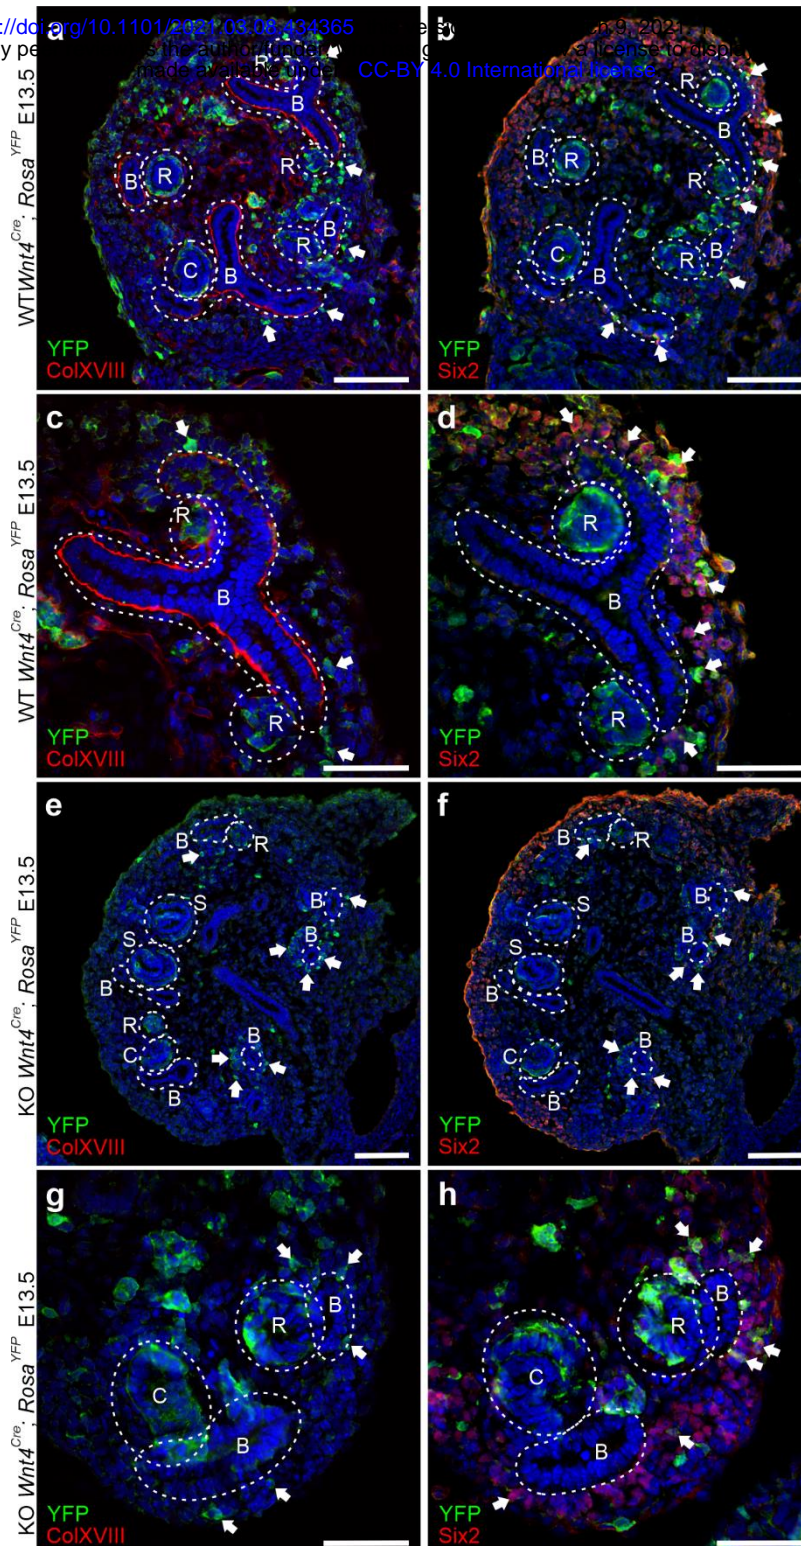

**Figure 6. Wnt4-positive cells were detected in NPC population and in a close proximity of the ColXVIII expression in E13.5 kidneys.** (a) In the WT E13.5 kidneys, the Wnt4+ cells (YFP-positive, arrows) were detected around the branching tubules (B) in the NPC population and in the renal precursors (renal vesicles (R) and comma- (C) and S-shape (S) bodies) closely localised with ColXVIII expression which was detected in the BMs of the branching tubules and the renal precursors. (b) Some of the Wnt4+ cells were also positive for Six2 indicating that these cells present NPCs. Some of the Six2 and Wnt4 positive cells are indicated with arrows. (c) A magnification of one branch surrounded by Wnt4+ cells (arrows) and Wnt4+ renal vesicles. (d) A magnification of the same branch indicating that some of the Wnt4+ cells express also Six2 and represent NPCs (arrows) in the cap mesenchyme (CM) area. (e) E13.5 ColXVIII KO kidneys stained against YFP and ColXVIII showed that the Wnt4+ cells (arrows) localised around the branching tubules and renal precursors similarly with the WT kidneys. (f) In the KO kidneys, some of the Wnt4+ cells expressed also Six2 (arrows) in the CM as seen in the WTs. (g) A magnification of a CM area of the E13.5 KO kidneys, where Wnt4+ cells were detected in the renal vesicles (R), comma-shape body (C) and in the CM area around the branches (B). (h) A magnification of the same area than in (g) stained against Six2 and YFP indicated that some of the Wnt4+ cells express also Six2 (arrows) in the CM area. Bar(a, b, e, and f): 100  $\mu$ m and bar(c, d, g, and h): 50  $\mu$ m.



153 **The lack of ColXVIII leads to branching defects, reduced nephron formation, and kidney hypoplasia**

154 We speculated that the diminution of the NPCs may be reflected to the capacity of the UB to branch (Cebrian,  
155 Asai, D'Agati, & Costantini, 2014; Oliver et al., 2006; Xu, J., Liu, Park, Lan, & Jiang, 2014). In addition, the  
156 localisation of the ColXVIII in the BMs of the developing ureteric tree, and especially the short isoform in the  
157 BMs around the ureteric tip cells, progenitors of the collecting ducts (Kurtzeborn, Kwon, & Kuure, 2019),  
158 suggested a potential role for ColXVIII in branching morphogenesis. Thus, the ureteric tree branching was  
159 imaged at defined developmental time points by optical projection tomography (OPT). The ureteric tree was  
160 stained with TROMA-1 and ureteric tips with the Wnt11.

161 The OPT studies revealed in all ColXVIII mutant mouse lines in comparison to control a significant reduction  
162 in the number of terminal branch points, which reflects the number of the ureteric tips (Fig. 7a,b – figure  
163 supplement 1a). The reduction in the ureteric tip count was most notable in the kidneys of P1 mice that were  
164 deficient of the short ColXVIII isoform. The same trend was also seen in total KO kidneys and in the P2 mice  
165 lacking the two longer isoforms (Fig. 7b). The OPT analyses of Wnt11 expression of mutant embryonic  
166 kidneys and controls at E14.5, E16.5, and newborns (NB) also demonstrated a reduction in the number of the  
167 ureteric tips from E14.5 onwards until birth in all ColXVIII mutants (Fig. 7 – figure supplement 1b-h) with  
168 some variation in the case of the fetuses lacking the two longer isoforms (Fig. 7 – figure supplement 1b-h).  
169 Specifically, the bifurcational branching events and ureteric tree length were reduced in all mutant mice when  
170 compared with controls at E15.5 (Fig. 7c,d). The kidneys of all mutant mice also had a slightly increased  
171 branching angle between the root branch and extending branch points, reflecting sparser branching of the  
172 ureteric tree (Fig. 7e).

173 To analyse when the branching defect begins in the ColXVIII-deficient mice, the E11.5, E12.5 and E13.5 WT  
174 and KO kidneys were stained against TROMA-1 and imaged either with confocal microscopy (E11.5 and  
175 E12.5) or OPT (E13.5) (Fig. 8a,c,e). The results showed that the branching of the tubular tree from E11.5 to  
176 E13.5 was comparable between the WT and KO kidneys (Fig. 8b,d,f).

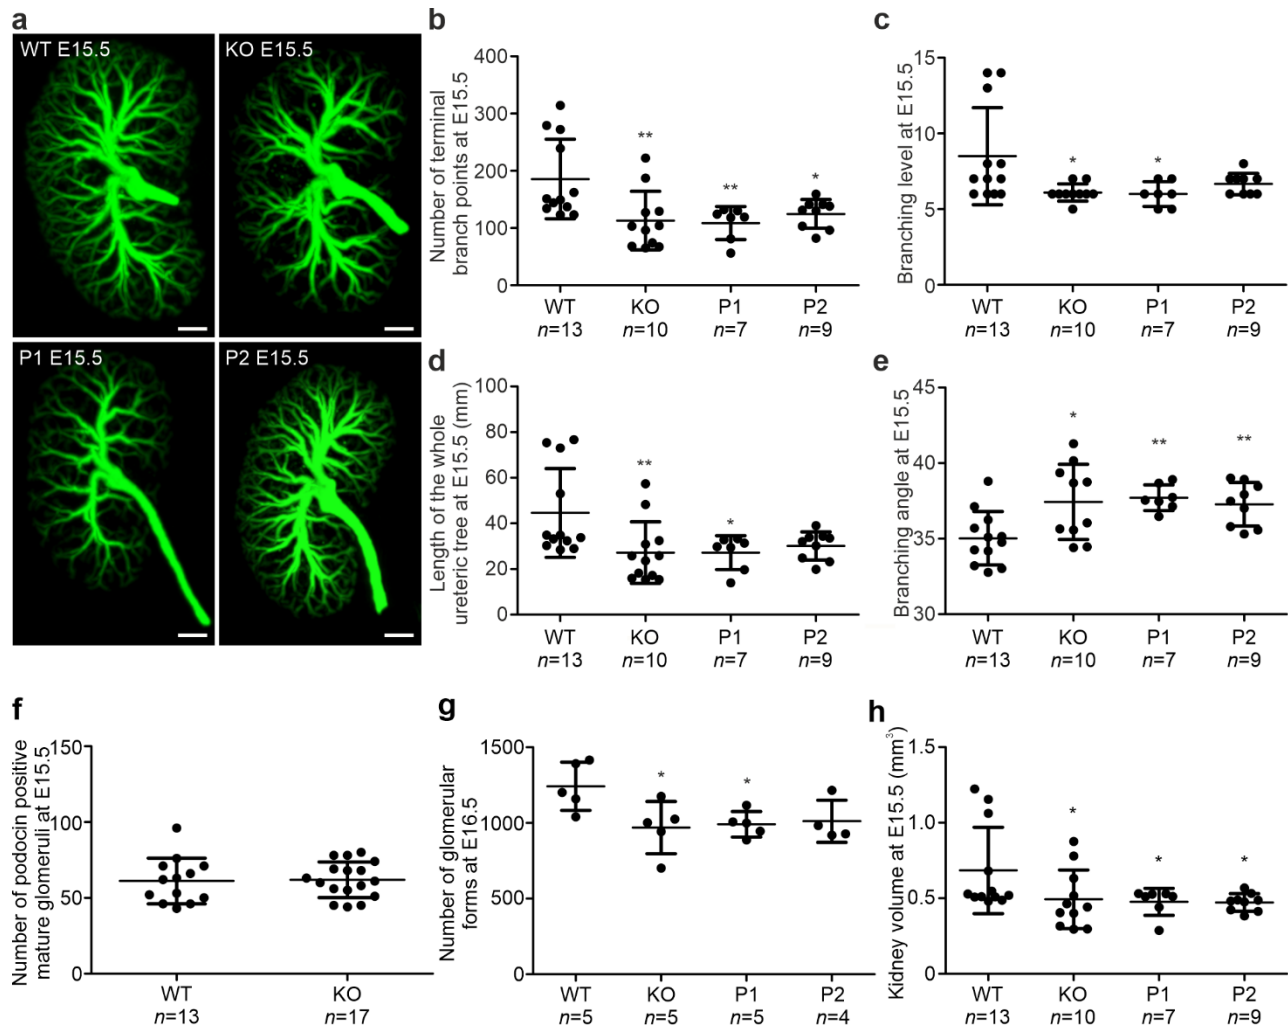

**Figure 7. Lack of ColXVIII and its three isoforms led to branching defects during renal development.**

(a) The OPT images of TROMA-1 stained E15.5 kidneys suggested a reduction in the branching of the ureteric tree in kidneys lacking all ColXVIII forms (KO) or the short form (P1). N(WT)=13, n(KO)=10, n(P1)=7, n(P2)=9. Bar: 200  $\mu$ m. (b) The number of terminal branch points was reduced at E15.5 in all ColXVIII mutant kidneys (KO, P1, and P2) when compared with WT kidneys. (c) Also, the branching level, which indicates the number of bifurcational branching events, was significantly reduced in kidneys lacking all or specifically the short form (KO, P1). (d) The length of the ureteric tree was significantly reduced in the E15.5 ColXVIII KO and P1 kidneys in comparison with WT kidneys. (e) The branching angle, which measures the angle between the root branch and extending branch points, was larger at E15.5 in ColXVIII mutant kidneys (KO, P1 and P2) than in WT kidneys. (f) Lack of ColXVIII did not change the number of podocin-positive mature glomeruli detected by OPT at E15.5. N(WT)=13, n(KO)=17. E15.5 was selected for podocin staining since the antibody did not penetrate into the older kidneys. (g) The number of glomeruli and glomerular precursors was decreased in all ColXVIII mutant mice (KO, P1 and P2) compared with WT mice at E16.5, but the difference was significant only between embryos lacking all or specifically the short form (KO, P1). N(WT)=5, n(KO)=5, n(P1)=5, n(P2)=4. E16.5 time point was used for calculations to take more of all the different glomerular forms into account. (h) ColXVIII mutant embryos (KO, P1, and P2) had smaller kidneys compared with WT embryos. The graph shows the E15.5 time point from TROMA-1 OPT analysed kidneys and figure supplement 1 E14.5 and E16.5 kidney volumes. In graphs, mean $\pm$ s.d. is presented. \*P<0.05, \*\*P<0.01 (Mann-Whitney U -test).



179 The tubular branching is connected to nephrogenesis (Cebrian et al., 2014; Cebrián, Borodo, Charles, &  
180 Herzlinger, 2004), and thus the number of glomeruli was analysed with OPT and podocin immunostaining  
181 depicting the mature glomeruli (Kirita et al., 2016; Roselli et al., 2002). At E15.5, no differences in the number  
182 of mature glomeruli between WT and KO kidneys (WT mean 61 ( $\pm$ 35) and KO mean 61.94 ( $\pm$ 18.06) glomeruli  
183 per kidney) were noted (Fig. 7f). Since only a few of the glomeruli are mature at this time point, the number  
184 of mature and developing glomeruli including renal vesicles, comma- and S-shape bodies, were next calculated  
185 from E16.5 serial sectioned whole kidneys. In this case, the number of glomeruli and glomerular precursors  
186 were decreased in all mutant mice, but the difference was statistically significant only for KO and P1 compared  
187 with WT (Fig. 7g).

188 Previous studies have linked the reduction of NPCs and tubular branching with renal hypoplasia (Cebrian et  
189 al., 2014; Cebrián et al., 2004; Chi et al., 2004; Xu, J. et al., 2014). Indeed, evaluation of the volumes of E14.5,  
190 E15.5, E16.5 and NB kidneys using either TROMA-1 or Wnt11 markers and OPT revealed that from E14.5  
191 onwards the P1 kidneys were hypoplastic and from E15.5 onwards also the KO kidneys were hypoplastic when  
192 compared with the WT (Fig. 7h - figure supplement 2). The P2 kidneys lacking only the two longer isoforms  
193 were significantly smaller than the WT kidneys only at E15.5 and NB (Fig. 7h – figure supplement 2). Thus,  
194 the decrease of the renal volume seemed to follow the observed decrease in the branching in the ColXVIII  
195 mutant mice as hypothesised. These findings indicated that ColXVIII, and especially its short form, is  
196 important for the branching of the ureteric tree, nephron formation, and overall kidney growth.

197

#### 198 **The lack of ColXVIII leads to changes in the cell cycle progression of the Six-positive NPCs**

199 Two differently behaving Six2<sup>+</sup> cell populations exist, those having a fast cell cycle and are committed to  
200 differentiate, and those having a slower cell cycle and maintain the NPC population (Short et al., 2014). The  
201 change in the balance of these two Six2<sup>+</sup> subpopulations might explain the observed decrease in the Six2<sup>+</sup> cell  
202 number in the ColXVIII mutant kidneys (Fig. 5g,i). Thus, we used flow cytometry to analyse whether the cell  
203 cycle progression of the Six2<sup>+</sup> NPCs would differ between WT and mutant mice at E13.5, E15.5 and E17.5  
204 time points. At E13.5, the Six2<sup>+</sup> cells of the KO kidneys were significantly less often in the G1 phase and  
205 significantly more often in the G2-M phase when compared with the WTs (Fig. 9a,c – figure supplement.



206 1a,b). In contrast, at E15.5 and E17.5, there were significantly more Six2+ cells in the G1 phase (Fig. 9d,g, -  
207 figure supplement 1c-f) and significantly less in the G2-M phase (Fig. 9f,i – figure supplement 1c-f) in the KO  
208 kidneys compared with WT kidneys. No significant changes were detected in the S-phase (Fig. 9b,e,h)

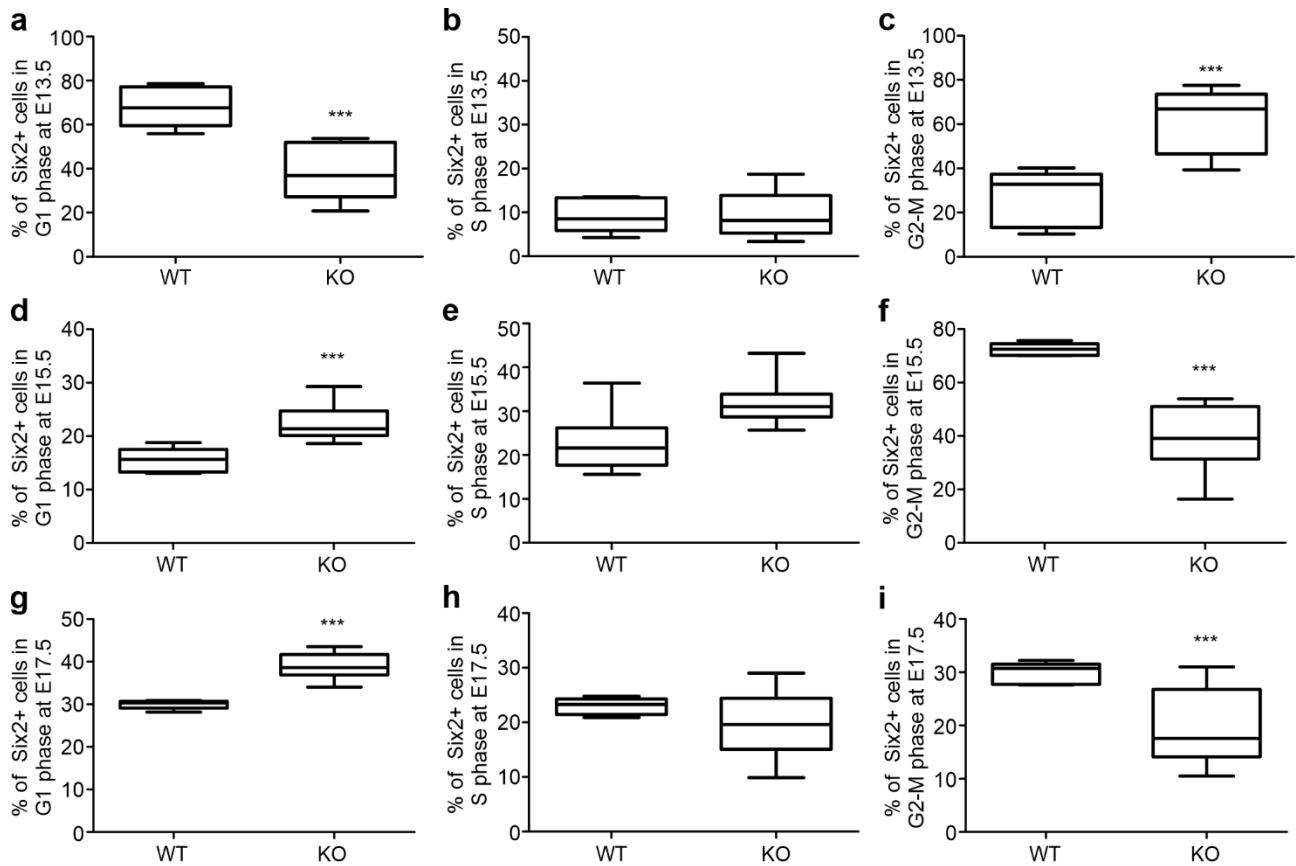

**Figure 9. ColXVIII deficiency changed cell cycle progression during kidney development.** (a) At E13.5, the number of Six2+ cells were significantly less in the G1 phase in the KO kidneys compared with the WTs. No change was detected in the S phase (b) between the WT and KO kidneys, but the Six2 cells were significantly more in G2-M phase in the KOs at E13.5 (c). At E15.5 the number of Six2+ cells were significantly more in the G1 phase (d) and significantly less in the G2-M phase (f) in the KO kidneys when compared with the WT but the difference in the S phase (e) was not significant. Similarly, at E17.5, the number of Six2+ cells was significantly higher in the KO kidneys in the G1 phase (g) and significantly lower in the G2-M phase (i) in comparison with the WT kidneys. No difference was detected in the S phase (h). N(WT E13.5)=4 , n(KO E13.5)=7 litters analysed separately. N(WT E15.5)=6, n(KO E15.5)=11, n(WT E17.5)=5, n(KO E17.5)=6 independent acquisitions in flow cytometry analysis per sample collected from three different litters. In graphs, the boxes show 1<sup>st</sup> and 3<sup>rd</sup> quartiles with mean, and the whiskers indicate min and max values. \*\*\*P<0.0001 (Mann-Whitney U -test).

209 We next analysed the number and localisation of the Ki67-positive (Ki67+) proliferating cells within the Six2-  
210 positive NPC cells using immunostaining against Ki67, Six2 and tubular marker TROMA-1. At E13.5, the KO  
211 kidneys had less Ki67+ cells in the Six2+ NPC population when compared with the WT (Fig. 10a,c). The  
212 proliferating Ki67+ cells localised less often to the cortex side of the nephrogenic niche (Fig. 10a, white arrows,  
213 d) where reside the slow cycling NPCs which maintain the NPC population. Similarly with the E13.5  
214 timepoint, there were significantly less Ki67+ cells in the Six2+ population at E16.5 in the KO kidneys when  
215 compared with the WTs (Fig. 10b,e), but no difference was observed in the localisation of the Ki67+ cells in  
216 the niches (Fig. 10f). Thus, the lack of ColXVIII probably affects the ratio of the fast versus slow cycling  
217 Six2+ cells, where at E13.5 the KO kidneys have more fast cycling Six2+ cells locating at the medullar side  
218 of the nephrogenic niche that are committed to differentiate. This fastened differentiation, in turn, might be a  
219 cause for the overall reduction of the Six2+ cells in niches observed at E13.5 onwards. At E15.5 and E17.5 the  
220 remaining Six2+ population in the KO kidneys represent more the slow cycling NPCs, maintaining the NPC  
221 population which is crucial for the continuity of the renal development.

222

### 223 **The N-terminus of ColXVIII rescues the branching defect in ColXVIII-deficient kidneys**

224 The N-terminal domains of ColXVIII have been reported to have functions in other tissues, which suggests  
225 that they might also participate in the regulation of tubulogenesis. For example, the Frizzled domain of  
226 ColXVIII has been shown to inhibit Wnt/ $\beta$ -catenin signalling, and the glycoprotein TSP1, resembling the  
227 TSP1-like domain of ColXVIII, can bind to integrins (DeFreitas et al., 1995; Hendaoui et al., 2012; Qu elard  
228 et al., 2008). Thus, we tested whether a recombinant N-terminal noncollagenous fragment of ColXVIII,  
229 containing the Frizzled, the TSP1-like and the MUCL-C18 domains, would exert any effect on tubular  
230 branching in kidney organ cultures (Fig. 1). Without the fragment, the branching of the ColXVIII KO kidneys  
231 stopped after a few branches, but the WT kidneys grew and branched robustly (Fig. 11a,b). In contrast, when  
232 the kidney rudiments were cultured with 500 ng/ml or 1000 ng/ml of the N-terminal fragment, the phenotype  
233 of the KO kidneys was rescued, and the branching occurred normally (Fig. 11a,b). Interestingly, the WT  
234 kidneys also seemed to benefit from the fragment by forming more branches, but the effect was moderate

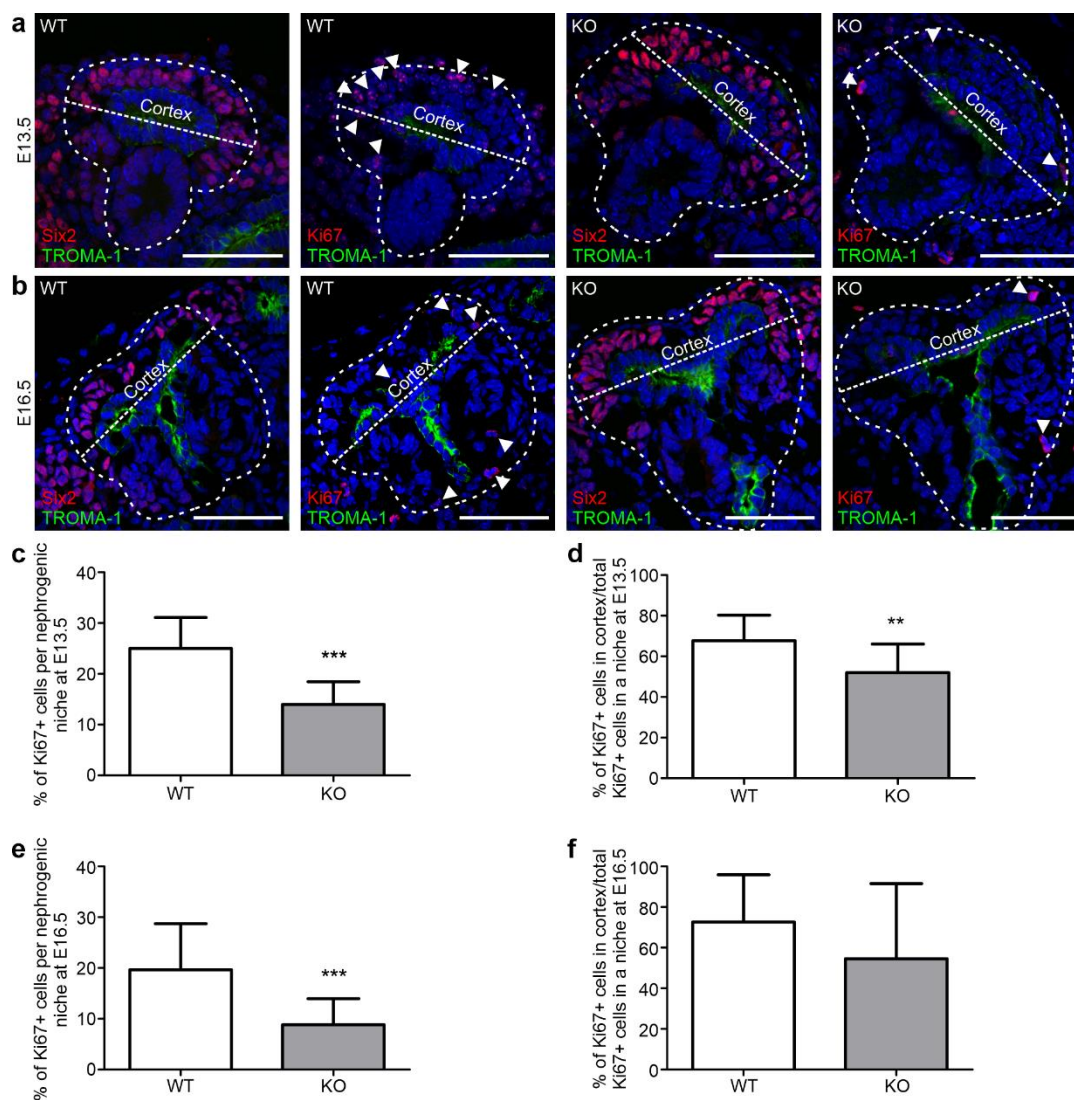

**Figure 10. The lack of ColXVIII changes the behaviour of the proliferating Six2+ cells.** (a) Images from the E13.5 kidneys stained against Six2, Ki67 and TROMA-1 indicated that the WT kidneys had more proliferating Six2+ and Ki67 positive (Ki67+) cells than the KO kidneys, and that these Ki67+, Six2+ cells localised mainly to the cortex side of the niche. (b) Similarly than at E13.5, at E16.5 the WT kidneys seemed to have more of the proliferating Ki67+, Six2+ cells in the nephrogenic niches when compared with the KO kidneys. Arrowheads point to Ki67+ cells in the nephrogenic niche indicated by the dashed lines. Bars: 50  $\mu$ m. (c) The calculations of the Ki67+ cells from each niche showed that the KO kidneys had indeed significantly less Ki67+ cells at E13.5. The graph shows the ratio of the Ki67+ cells/total number of Six2+ cells in each counted niche. (d) In the KO kidneys the Ki67+, Six2+ cells also localised significantly less to the cortex side of the niche. (e) At E16.5 the KO kidneys had less proliferating cells in the niches when compared with the WT. (f) However, at E16.5 the localisation of the Ki67+ cells in the niches was comparable between the WT and KO kidneys. In graphs, columns indicate mean $\pm$ s.d. N=3 kidneys in each genotype and timepoint. \*\*P<0.01, \*\*\*P<0.0001 (Mann-Whitney U -test).

236 compared with the KO kidneys (Fig. 11b). This indicated that the N-terminal domains of ColXVIII affect  
237 tubulogenesis and strikingly rescue the branching defect of the ColXVIII-deficient kidneys.

238 The TSP1-like domain is the only common N-terminal domain for all ColXVIII isoforms. Since the branching  
239 analyses indicated that especially the short ColXVIII isoform is important for ureteric branching, we performed  
240 the kidney organ cultures with the recombinant TSP1-like fragment (Fig. 1) to evaluate its role in the branching  
241 morphogenesis. The kidney cultures were treated either with 200 ng/ml or with 500 ng/ml of the TSP1-like  
242 fragment.

243 The treatment of the WT kidneys with the TSP1-like fragment did not cause any changes in the branching  
244 morphogenesis when compared with the untreated kidneys (Fig. 11c,d). In contrast, the treatment of the KO  
245 kidneys with 200 ng/ml of the TSP1-like fragment caused a similar rescue effect of the ureteric branching than  
246 was seen with the full N-terminal fragment (Fig. 11c,d). The treatment with 500 ng/ml of the TSP1-like  
247 fragment also benefitted the branching of the KO kidneys but less than the treatment with less of the TSP1-  
248 like fragment (Fig. 11c,d). These results suggest a novel role for the TSP1-like domain of ColXVIII as the  
249 main branching promoting part of the N-terminus.

250

### 251 **Integrin $\alpha 3 \beta 1$ is a potential receptor to mediate the branching promoting effect of the TSP1-like domain**

252 The TSP1 protein has been shown to bind integrin  $\alpha 3 \beta 1$  and, interestingly, the kidney phenotypes of *Itga3*-  
253 null mice, as well as *Itgb1* knockout in UB, resemble the one described here for the ColXVIII-deficient mice  
254 (DeFreitas et al., 1995; Kreidberg et al., 1996; Wu et al., 2009; Zhang et al., 2009). Hence, the colocalisation  
255 of integrin  $\alpha 3$  and  $\beta 1$  subunits, ColXVIII and *Six2* was studied by immunostaining E16.5 kidney sections. The  
256 expression of both integrin subunits overlapped with the expression of ColXVIII and the *Six2*<sup>+</sup> cells were  
257 detected in close proximity (Fig. 12 and 13). Moreover, lack of ColXVIII did not affect the expression patterns  
258 of the  $\alpha 3$  and  $\beta 1$  integrin subunits.



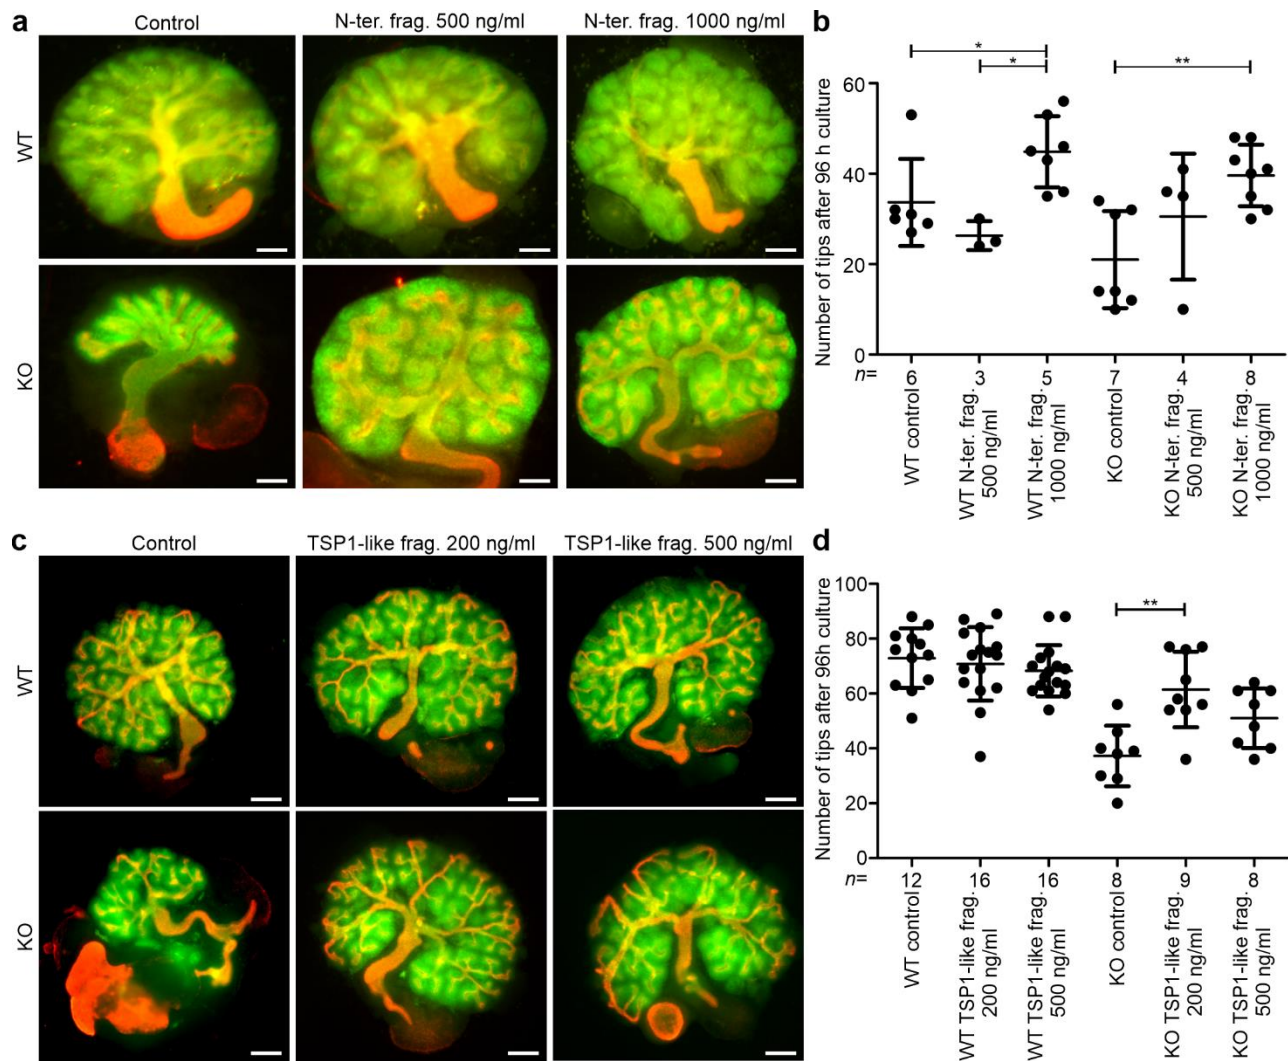

**Figure 11. The N-terminal noncollagenous fragment of ColXVIII, and the TSP1-like domain within it, rescued the branching defect observed in the ColXVIII-deficient kidneys.** (a) E11.5 WT and ColXVIII KO kidneys were cultured for 96 h in standard culture conditions or with addition of 500 ng/ml or 1000 ng/ml of the N-terminal fragment (N-ter. frag.) (see also Fig. 1). Bar: 100  $\mu$ m. (b) The number of the ureteric tips of the kidneys cultured with or without the N-terminal fragment for 96 h was assessed by calculating the tips of the TROMA-1 stained ureteric tree. (c) E11.5 WT and KO kidneys cultured for 96 h in standard culture conditions or with addition of 200 ng/ml or 500 ng/ml of the TSP1-like recombinant fragment (TSP1-like frag.) (see also Fig. 1). Bar: 100  $\mu$ m. (d) The number of ureteric tips after 96 h of culture with or without the TSP1-like fragment. In (b) and (d), the number (n) of cultured kidneys/condition is indicated under the column. Green: Pax2 staining indicating the mesenchyme; red: TROMA-1 staining indicating the ureteric tree. In graphs, mean $\pm$ s.d. is shown. \*P<0.05, \*\*P<0.01, and \*\*\*P<0.001 (Kruskal-Wallis test with Dunn's multiple comparison test).

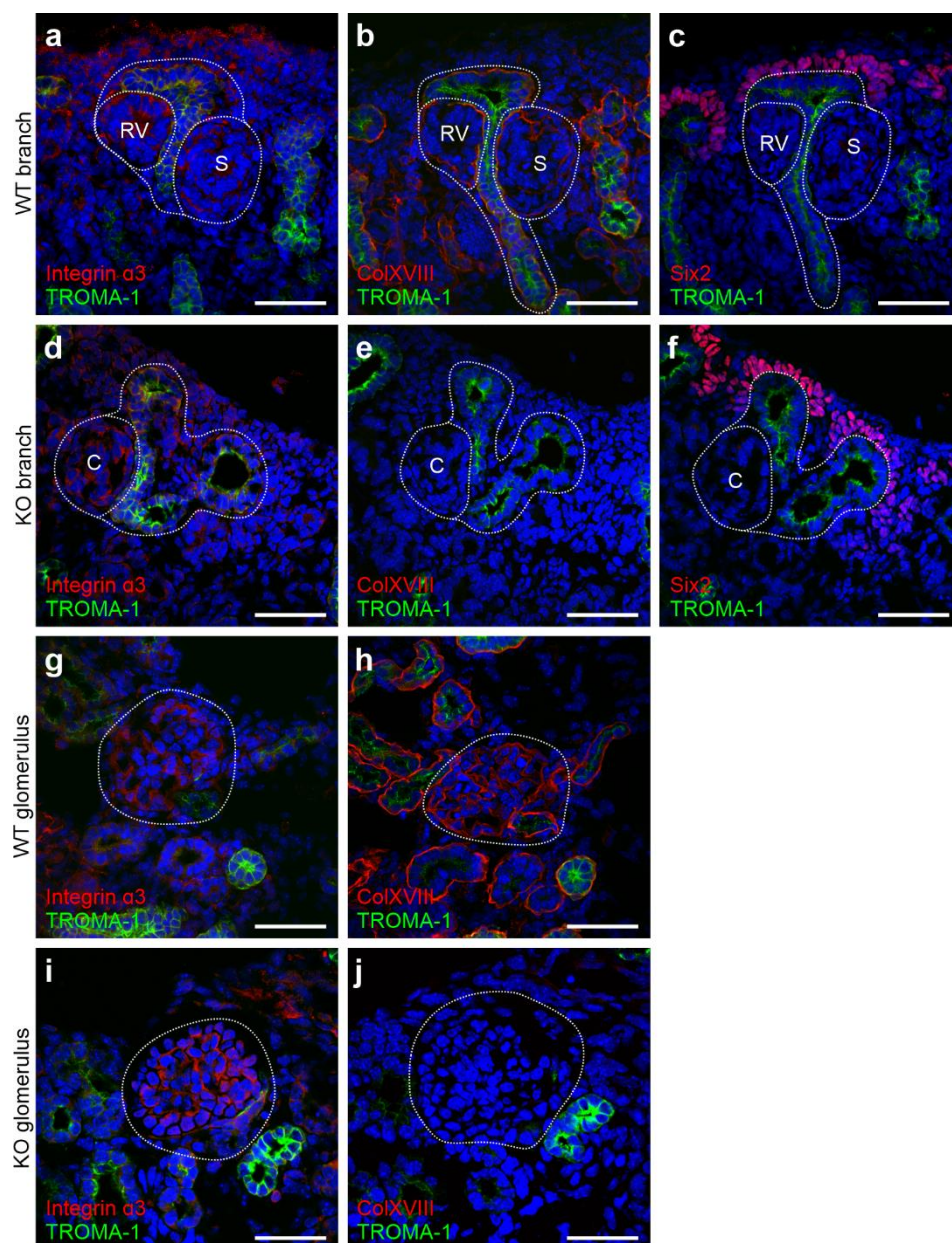

**Figure 12. Integrin  $\alpha 3$  subunit expression in E16.5 kidneys was detected in the same locations as ColXVIII and in a close proximity of the Six2-positive NPCs.** Integrin  $\alpha 3$  staining of (a) WT and (d) ColXVIII KO kidneys in the branching tubules marked by TROMA-1 staining, and renal precursors under the branches. Dashed areas indicate integrin  $\alpha 3$ -positive branch and the renal precursors (RV=renal vesicle, C=comma-shape body, S=S-shape body) of the branches. The same branch than in (a) and (d) in the next section stained against ColXVIII and TROMA-1 in the WT (b) and the KO (e) as well as against Six2 and TROMA-1 in the WT (c) and the KO (f). Integrin  $\alpha 3$  expression in the glomerulus (dashed area) of the WT (g) and KO (i) kidneys. ColXVIII expression was detected in same locations than the integrin  $\alpha 3$  in the WT glomerulus (h, dashed area). TROMA-1 staining was used in the identification of the same structures in the serial sections. In the KO kidneys ColXVIII expression was not detected in the glomerulus (j). Bar: 50  $\mu$ m. Green= TROMA-1, red= integrin  $\alpha 3$ /ColXVIII/Six2.



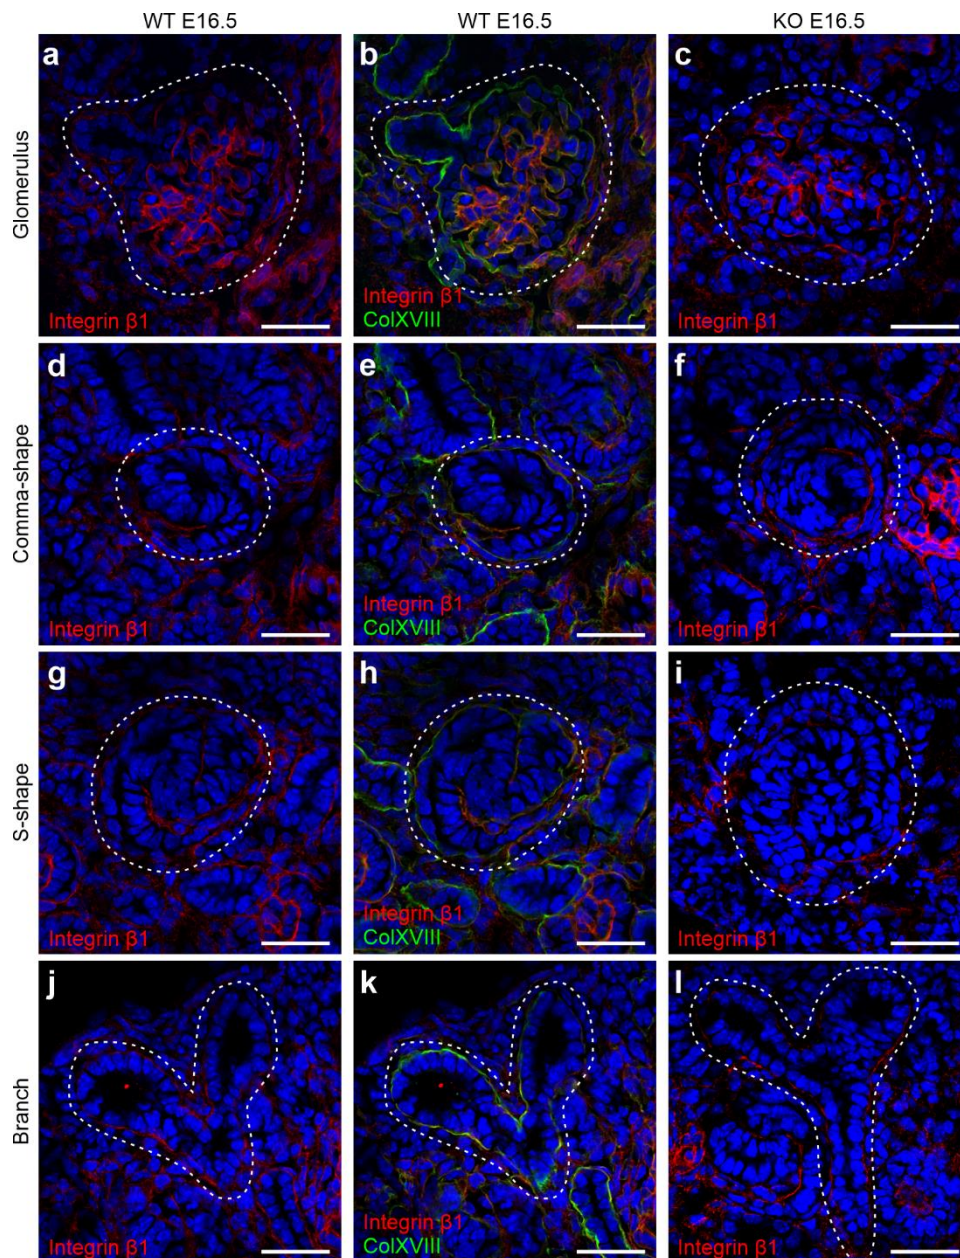

**Figure 13. ColXVIII colocalised with integrin  $\beta$ 1 in the BMs during renal development.** Images show integrin  $\beta$ 1 (red) and ColXVIII (green) expression at E16.5, where yellowish and orange colors indicate colocalisation in the merged images. Integrin  $\beta$ 1 expression in the glomeruli of (a) WT and (c) KO kidneys. (b) Merged image of ColXVIII and integrin  $\beta$ 1 staining in the WT glomerular BM. Integrin  $\beta$ 1 expression in a comma-shaped body in (d) WT and (f) KO kidneys. (e) Merged image of ColXVIII and integrin  $\beta$ 1 staining in the WT comma-shaped body's BM. Expression of integrin  $\beta$ 1 in an S-shape body in (g) WT and (i) KO kidneys. (h) Merged image of ColXVIII and integrin  $\beta$ 1 in the S-shape body in WT kidneys. Integrin  $\beta$ 1 expression in branching tubules in (j) WT and (l) KO kidneys. (k) Merged image of ColXVIII and integrin  $\beta$ 1 in the BMs of the branching tubules. Dashed areas indicate glomeruli, comma- and S-shape bodies, as well as branching tubules, respectively. Bar: 50  $\mu$ m.

261

262

263

264 To study integrin  $\alpha3\beta1$  as a putative receptor for the N-terminal part of ColXVIII the kidney cultures were  
265 treated with integrin  $\alpha3$  or  $\beta1$  function blocking antibodies. Inhibiting integrin  $\alpha3$  or  $\beta1$  functions with the  
266 respective antibodies strongly inhibited the tubular branching of the cultured WT kidneys, which was seen as  
267 a reduction of the number of tips when compared with IgG-treated controls (Fig. 14a-d). In the KO cultures,  
268 the branching appeared further reduced when the integrin antibodies were added (Fig. 14a-d). The rescue of  
269 the branching defect of the KO kidneys with the N-terminal fragment (Fig. 14a-d) was inhibited by the addition  
270 of the integrin  $\alpha3$  or  $\beta1$  blocking antibodies, and neither was there a rescue of the integrin antibody-induced  
271 branching defect of the WT kidneys (Fig. 14a-d). Thus, the results suggest that integrin  $\alpha3\beta1$  could mediate  
272 the function of the N-terminal fragment on the developing ureteric tree.

273 To study the TSP1-like domain of ColXVIII in more detail, we performed a sequence alignment and protein  
274 structure prediction. The consensus recognition site for integrin  $\alpha3\beta1$  is residues 190-201 of TSP1  
275 (FQGV LQNVR FVF) where the sequence Asn-Val-Arg (NVR) is shown to be essential (Krutzsch, Choe,  
276 Sipes, Guo, & Roberts, 1999). Here we discovered that TSP1 and ColXVIII have conserved integrin  $\alpha3\beta1$   
277 recognition sequences in humans and mice: out of 12 amino acid residues of the consensus sequence  
278 FQGV LQNVR FVF, ColXVIII (FQGMISELKVRK) has three identical and five similar ones as TSP1 (Fig.  
279 14e). Although ColXVIII does not possess the essential sequence Asn-Val-Arg, the respective sequence Glu-  
280 Leu-Lys in ColXVIII is structurally comparable.

281 To explore the 3D structure of the binding site further, we generated a homology model of the TSP1-like  
282 domain of ColXVIII with PHYRE2 (Kelley, Mezulis, Yates, Wass, & Sternberg, 2015). Superimposing the  
283 homology model with the human TSP1 crystal structure (PDB code 1ZA4) (Tan et al., 2006) revealed a high  
284 structural similarity in the integrin binding region, thus proposing integrin  $\alpha3\beta1$  as a potential a receptor for  
285 the TSP1-like domain of ColXVIII (Fig. 14f,g).

286



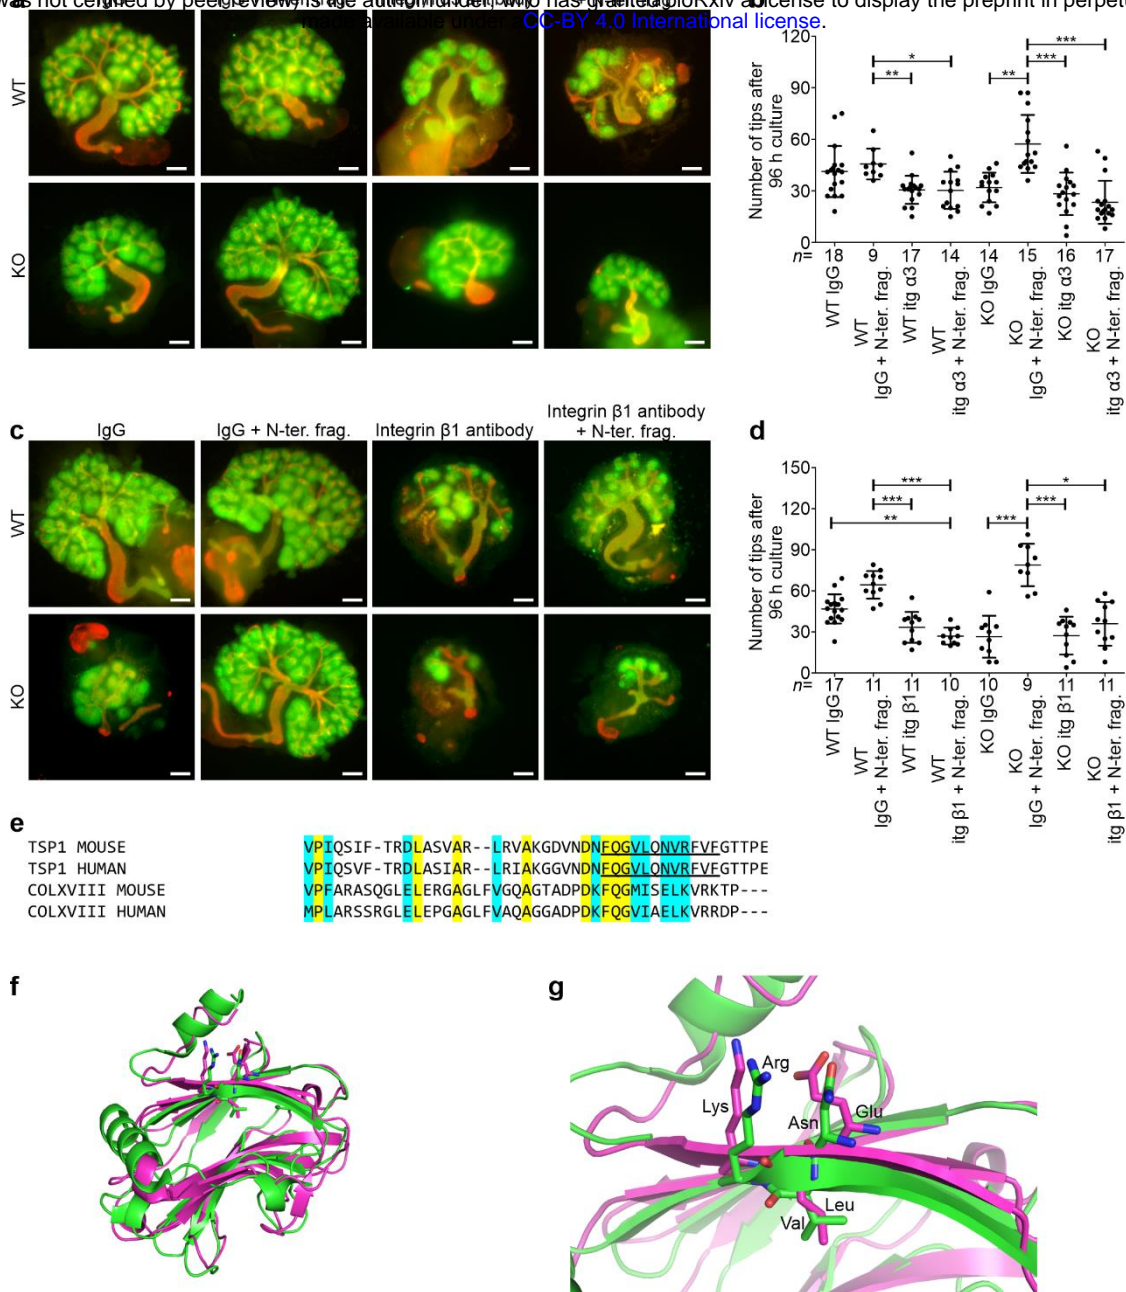

287

**Figure 14. Integrin  $\alpha$ 3 $\beta$ 1 is a potential receptor to mediate the effects of the TSP1-like domain of ColXVIII in branching morphogenesis.** (a) Treatment of the WT and KO kidney cultures with an integrin  $\alpha$ 3 antibody or with a control IgG. In addition, 1000 ng/ml of N-terminal fragment (N-ter. frag.) were added to part of the cultures. Bar: 100  $\mu$ m. (b) The number of the ureteric tips at 96 h of kidneys cultured with or without the integrin  $\alpha$ 3 antibody and N-terminal fragment assessed by calculating the tips of the TROMA-1 stained ureteric tree. (c) Treatment of the WT and KO kidney cultures with an integrin  $\beta$ 1 antibody or with a control IgG. In addition, 1000 ng/ml of N-terminal fragment were added to part of the cultures. Bar: 100  $\mu$ m. (d) The number of the ureter tips at 96 h of kidneys cultured with or without the integrin  $\beta$ 1 antibody and N-terminal fragment assessed by calculating the tips of the TROMA-1 stained ureteric tree. In (b) and (d) the number (n) of cultured kidneys/condition is indicated below of the column. Green: Pax2 staining indicating the mesenchyme; red: TROMA-1 staining indicating the ureteric tree. (e) Multiple sequence alignment of the integrin  $\alpha$ 3 $\beta$ 1 recognition sequence of mouse and human TSP1, and respective sequence of mouse and human ColXVIII. Conserved amino acids are colored in yellow and similar amino acids in cyan. The integrin  $\alpha$ 3 $\beta$ 1 binding site FQGVQLQNVRFVF of TSP1 is underlined. (f) Superimposed human TSP1 (PDB code: 1ZA4, green cartoon representation) and the homology model of mouse ColXVIII TSP1-like domain (pink cartoon representation). (g) Close view of the Asn-Val-Arg motif of TSP1 (green carbon atoms) and homologous Glu-Leu-Lys motif of ColXVIII (pink carbon atoms). In graphs, mean $\pm$ s.d. is shown. \* $P$ <0.05, \*\* $P$ <0.01, and \*\*\* $P$ <0.001 (Kruskall-Wallis test with Dunn's multiple comparison test).

## 288 **DISCUSSION**

289 In this study, we found that ColXVIII is crucial in the regulation of the NPC behaviour and that ColXVIII  
290 deficiency leads to altered tubular branching, reduced nephron formation, and kidney hypoplasia. In addition,  
291 our results indicated different expression patterns of ColXVIII isoforms in the developing kidney and identified  
292 a novel role for the ColXVIII N-terminal TSP1-like domain as a driver of tubular branching which probably  
293 functions through integrins (Fig. 15).

294 The NPC population is crucial for kidney formation as it produces inductive signals for the UB to invade the  
295 MM and to branch, while also being the cell pool from which nephrons arise (Costantini & Kopan, 2010; Little  
296 & McMahon, 2012; Oliver et al., 2006). In addition, the UB provides signals for the MM to undergo  
297 mesenchymal-epithelial transition to generate renal vesicles that mature to glomeruli (Carroll, Park, Hayashi,  
298 Majumdar, & McMahon, 2005; Halt & Vainio, 2014; Little & McMahon, 2012). In previous studies, reduced  
299 numbers of NPCs were found to cause decreased branching and nephron formation, finally leading to  
300 hypoplastic kidneys (Cebrian et al., 2014; Muthukrishnan, Yang, Friesel, & Oxburgh, 2015; Oliver et al., 2006;  
301 Xu, J. et al., 2014; Xu, P. et al., 2014). For example, in *Osr1*- and *Six2*-deficient embryos, both having a  
302 diminished CM cell population, the CM prematurely differentiates to form glomeruli (Oliver et al., 2006; Xu,  
303 J. et al., 2014). The premature differentiation of the CM cells affects reciprocal signalling between MM and  
304 UB, leading to decreased branching and nephrogenesis, as well as kidney hypoplasia (Costantini & Kopan,  
305 2010; Oliver et al., 2006). Similar observations were made here in the ColXVIII-deficient fetal kidneys. The  
306 Six2+ NPC population was decreased in the ColXVIII-deficient mice at E13.5 and E15.5, and the cell cycle  
307 progression of these cells was affected in the ColXVIII mutants. We found that at E13.5 there were more fast  
308 cycling Six2+ cells, representing cells committed to differentiation, which in turn might lead to the observed  
309 decrease of the Six2+ NPC population. At E15.5 and E17.5 the KO kidneys had more slow cycling Six2+ cells  
310 than the WTs suggesting that the reduced NPC population in the KO kidneys tried to retain this population to  
311 ensure the continuity of the development. We detected a similar number of the mature glomeruli at E15.5  
312 between the WT and the KO that could be explained by the fastened NPC differentiation at E13.5 in the KOs.  
313 However, the overall decrease in the number of Six2+ NPCs, and later a slowing down in the cell cycle  
314 probably leads to the detected reduction in the total number of the forming nephrons. The lack of ColXVIII

315 was shown to also delay the time when the Wnt4+ cells appeared in the developing kidney that might indicate  
316 also a wider defect in the NPC induction in the ColXVIII mutants. The results also revealed that the NPC  
317 population is decreased before the branching defect begins in the ColXVIII mutant fetuses suggesting that this  
318 reduction is at least partly a cause for the branching defect.

319 The short ColXVIII isoform is the sole form in the BMs of branching tips where lies the progenitor cells of  
320 the entire collecting duct system (Kurtzeborn, Cebrian, & Kuure, 2018) and in the BMs of the nephron  
321 precursors. It is also the only form expressed during early kidney development, and thus the functional protein  
322 domains characterising this isoform are presumably the most crucial for kidney formation. A treatment with  
323 the C-terminal endostatin domain has been shown to inhibit the branching in kidney and lung *in vitro*  
324 (Karihaloo et al., 2001; Lin et al., 2001). However, our results indicated that the lack of ColXVIII, containing  
325 the endostatin domain, leads to reduced branching and kidney growth *in vivo* suggesting that other parts of  
326 ColXVIII regulate branching morphogenesis. Indeed, our *in vitro* studies with cultured kidney rudiments  
327 showed that the N-terminal domain of ColXVIII, consisting of a TSP1-like domain, a MUCL-C18 domain and  
328 a Frizzled domain, rescues the branching defect in the cultured ColXVIII KO kidneys and even promotes the  
329 branching of the WT kidneys. The results also suggested that the TSP1-like domain is the most important  
330 domain in this rescue effect, but further studies are needed to ensure this.

331 Earlier studies have shown that the glycoprotein TSP1 affects angiogenesis, tumour growth, and kidney injury  
332 (Kazerounian, Yee, & Lawler, 2008; Kyriakides & Maclauchlan, 2009; Maimaitiyiming, Zhou, & Wang,  
333 2016). TSP1 also forms complexes with integrin  $\alpha 3\beta 1$  and, thus, regulates neuronal outgrowth, as well as  
334 endothelial cell proliferation (Calzada et al., 2004; Chandrasekaran et al., 2000; DeFreitas et al., 1995). The  
335 phenotype of *Itga3*-null kidneys resembles the phenotype seen here in ColXVIII-deficient kidneys showing  
336 reduced tubular branching, kidney hypoplasia, and ultrastructural changes similar to those observed in adult  
337 ColXVIII-deficient mice (Kinnunen et al., 2011; Kreidberg et al., 1996). Similarly, selective deletion of *Itgb1*  
338 in the UB leads to severe branching defects with nephron reduction and kidney hypoplasia (Wu et al., 2009;  
339 Zhang et al., 2009). In our *in vitro* studies, the function of the N-terminal fragment was inhibited by blocking  
340 the integrin subunits  $\alpha 3$  or  $\beta 1$ , suggesting that the effects of the N-terminal domain in the ureteric branching  
341 are mediated *via* integrin  $\alpha 3\beta 1$ .

342 Previous publications have identified a consensus recognition site for integrin  $\alpha3\beta1$  in TSP1, specifically  
343 residues 190-201 (peptide 678, FQGVLQNVRVFV) (Furrer, Luy, Basrur, Roberts, & Barchi, 2006; Krutzsch  
344 et al., 1999). For the integrin  $\alpha3\beta1$  recognition, a highly conserved Asn-Val-Arg motif in this peptide is  
345 essential. However, peptidomimetic studies have revealed that some analogous of the Asn-Val-Arg motif are  
346 functional. Compared to the putative integrin  $\alpha3\beta1$  binding motif of ColXVIII (Glu-Leu-Lys), TSP1 peptide  
347 derivatives Asp-Val-Arg, Asn-Leu-Arg and Asn-Val-Lys are functionally comparable to the Asn-Val-Arg motif  
348 (Furrer et al., 2006). Since the modification of Asn to acidic Asp retains functionality, it is likely that also  
349 structurally and chemically similar Glu is active in this position. These results indicate that the  
350 FQGMISELKVRK motif of ColXVIII is a putative integrin  $\alpha3\beta1$  recognition site. However, further studies  
351 are needed to reveal whether the TSP1-like domain could directly bind with integrin  $\alpha3\beta1$  or some other  
352 integrins and thus mediate its functions during renal development.

353 In conclusion, our results indicated a crucial role for ColXVIII in kidney development where it regulates NPC  
354 behaviour, branching morphogenesis, and nephron formation, all processes whose defects are linked to the  
355 increased probability of renal diseases and failure.



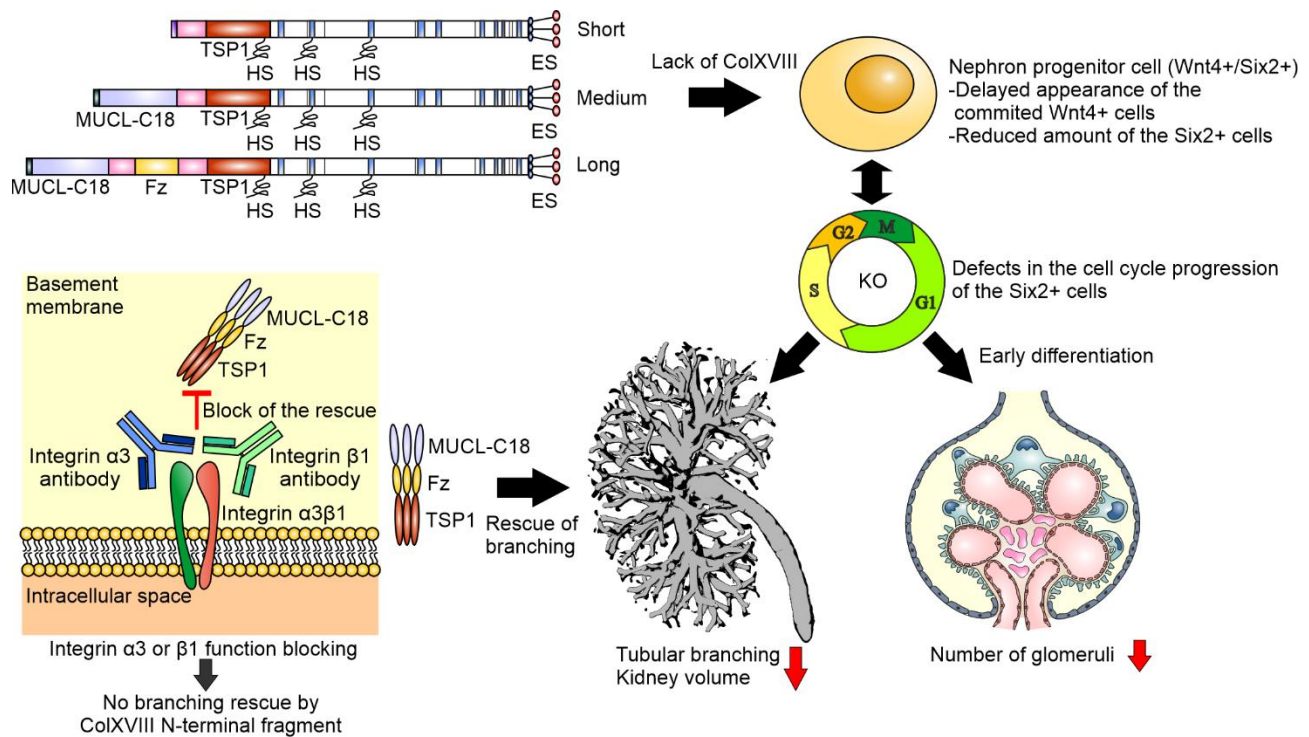

**Figure 15. A schematic picture of the role of ColXVIII in kidney development.** Lack of ColXVIII, and especially its short form, caused changes in NPC behaviour. These changes included the delayed appearance of Wnt4+ signal and changes in the cell cycle progression of the Six2+ NPCs. Furthermore, the changes in the NPC behaviour caused a defect in the branching morphogenesis of the tubular tree. This branching defect of ColXVIII-deficient kidneys can be rescued by the addition of N-terminal domain of ColXVIII *in vitro*. In addition, the results indicated that the ColXVIII N-terminal TSP1-like domain promotes the branching, and that the blocking of the function of integrin α3 or β1 could inhibit the rescue effect of the ColXVIII N-terminal fragment. ES: endostatin; HS: heparan sulphate; TSP1: thrombospondin 1-like domain; MUCL-C18: mucin-like domain in ColXVIII; Fz: Frizzled domain.

## 357 MATERIALS AND METHODS

### 358 Animal models

359 All animal experiments were approved by the Laboratory Animal Centre of the University of Oulu and carried  
360 out in accordance with Finnish legislation, the European Convention ETS No. 123, and European Directive  
361 2010/63/EU. The generation of transgenic ColXVIII total knockout (*Col18a1*<sup>-/-</sup>, KO) targeting exon 30 in the  
362 *Col18a1* gene, and the promoter-specific mouse lines (*Mus musculus*, *Col18*<sup>P1/P1</sup>, P1, and *Col18*<sup>P2/P2</sup>, P2)  
363 targeting exons 1 and 3 in *Col18a1*, respectively, have been previously described (Aikio et al., 2014; Olsen et  
364 al., 2002). For lineage tracing studies floxed *Rosa26*<sup>LacZ</sup>, *Rosa26*<sup>YFP</sup>, and *Wnt4*<sup>EGFPCre</sup> mouse lines (Shan, Jokela,  
365 Skovorodkin, & Vainio, 2010) were crossed with the *Col18a1*<sup>-/-</sup> line to generate *Rosa26*<sup>LacZ</sup>; *Col18a1*<sup>-/-</sup>,  
366 *Rosa26*<sup>YFP</sup>; *Col18a1*<sup>-/-</sup> and *Wnt4*<sup>EGFPCre</sup>; *Col18a1*<sup>-/-</sup> lines. The WT, KO, P1 and P2 mice were first in the  
367 C57Bl/JOlHsd background and the ColXVIII *in situ* hybridisations, immunofluorescence (IF) staining and  
368 qPCRs, E15.5 TROMA-1 and podocin OPT analyses, E14.5, E16.5 and part of the NB Wnt11 *in situ*  
369 hybridisations were done with these mice. On account of a change in the mouse lines used at the Laboratory  
370 Animal Centre, the background of the mice was changed during the study to C57Bl/N6CrJ, and part of the NB  
371 Wnt11 *in situ* hybridisations and all Six2 multiphoton analyses, organ cultures, NPC cultures, integrin IF  
372 staining, flow cytometry analyses and the branching analyses of the E11.5-E13.5 were done with these mice.  
373 The *Rosa26*<sup>LacZ</sup>, *Rosa26*<sup>YFP</sup>, and *Wnt4*<sup>EGFPCre</sup> mice were in the C57Bl/NCrJ background. The vaginal plug  
374 appearance of the inbred mice was used as a criterion for mating and the right age of the embryos was  
375 confirmed with the somite counting of the E10.5-E11.5 and the limb bud staging in the older embryos.

### 376 *In situ* hybridisation

377 Section and whole-mount *in situ* hybridisations were performed as described earlier (Lin et al., 2001; Pietilä  
378 et al., 2016). For a DIG-labelled antisense and sense riboprobes, a vector cloned 783–1,592 bp fragment of  
379 mouse ColXVIII complementary DNA (cDNA) (GenBank NM\_001109991.1) was linearised with BamHI and  
380 XhoI. The Wnt11 probe was generated from a linearised plasmid obtained as a gift from Professor Andrew  
381 McMahon (University of Southern California, USA) (Majumdar, Vainio, Kispert, McMahon, & McMahon,  
382 2003). The hybridised whole kidneys were photographed with Olympus SZX12 microscope and Olympus PEN

383 E-P1 digital camera (Olympus Corporation, Tokyo, Japan), and sections with Leica DM LB2 microscope by  
384 using C PLAN 4x/0.10, C PLAN 10x/0.22 and C PLAN 20x/0.40 objectives, and Leica Application Suite V4.3  
385 (Leica, Wetzlar, Germany).

### 386 **Collagen XVIII antibody**

387 Rabbit anti-collagen XVIII antibody was raised as follows. The RNA isolated from the mouse endothelioma  
388 cell line eEnd.2 was used to amplify reverse transcriptase PCR to obtain complementary DNA (cDNA)  
389 encoding the TSP1-like domain of mouse collagen XVIII. The amplified cDNA was inserted into the episomal  
390 expression vector pCEP-Pu, which contained in addition the signal peptide of BM-40, to transfect human  
391 EBNA-293 cells (Kohfeldt, Maurer, Vannahme, & Timpl, 1997). The recombinant TSP1-like domain was  
392 purified from conditioned medium using dimethylaminoethanol (DEAE) cellulose followed by Superose 6  
393 molecular sieve chromatography and then used for immunising of a rabbit. The antibody was purified using  
394 the recombinant TSP1-like domain-coupled Sepharose 4B. The antibody was compared with existing  
395 ColXVIII antibodies and was found to be highly specific.

### 396 **Immunofluorescence and $\beta$ -galactosidase staining**

397 For immunostaining, paraffin and cryosections were cut to a 5- or 7- $\mu$ m thickness. Rabbit anti-ColXVIII  
398 antibody (1  $\mu$ g/ml) was produced and purified as described above. Primary antibodies against TROMA-1  
399 (DSHB, 1:500), Six-2 (11562-1-AP; Proteintech, 1:200), podocin (P0372; Sigma, 1:300), Ki67 (Ab15580;  
400 Abcam, 0.25-0.5  $\mu$ g/ml), integrin subunits  $\alpha$ 3 (AB1920; Millipore, 1:1000), and  $\beta$ 1 (553715; BD Bioscience,  
401 1:100), and GFP (NB100-1770SS, Novus Biologicals, 1:200) were used. The secondary antibodies used were  
402 anti-rat Alexa Fluor 594 (A11007; Molecular Probes, Invitrogen), anti-rabbit Alexa Fluor 488 (A11008,  
403 Molecular Probes, Invitrogen), anti-rabbit Cy3 (111-165-144; Jackson Immunoresearch), anti-rat Cy2 (112-  
404 225-167; Jackson Immunoresearch), anti-rabbit Alexa Fluor 647 (ab150079; Abcam), and anti-rabbit Cy2  
405 (112-225-167; Rockland). Secondary antibodies were diluted 1:300 for section staining and 1:800 for whole-  
406 mount staining. DAPI (D9542, Sigma, 2,9  $\mu$ g/ml) was used to stain the nuclei. The stained IF sections were  
407 examined with a Zeiss LSM700 confocal microscope by using Plan-Apochromat 20x/0.8 and Plan-  
408 Apochromat 63x/1.4 DIC Oil objectives and a Zen 2009 (black edition, Zeiss) program (Carl Zeiss, Jena,

409 Germany) or with a Zeiss LSM780 confocal microscope by using Plan-Apochromat 20x/0.8 DIC and i Plan-  
410 Apochromat 63x/1.4 DIC Oil objectives, and a Zen 2012 (black edition, Zeiss) program. Excitation  
411 wavelengths for DAPI was set to 405 nm, for Alexa Fluor 488 and Cy2 to 488 nm, for Cy3 to 514 nm, for  
412 Alexa Fluor 594 to 561 nm, and for Alexa Fluor 647 to 633 nm. Collected emission wavelengths were 410-  
413 495 nm for DAPI, 490-543 nm for Alexa Fluor 488 and Cy2, 557-681 nm for Cy3, 569-639 nm for Alexa  
414 Fluor 594, and 638-735 nm for Alexa Fluor 647.

415  $\beta$ -galactosidase staining was performed with E11.5 embryos according to Shan *et al.* 2010 (Shan et al., 2010).  
416 The E11.5 stained samples were paraffinised, cut into 7- $\mu$ m thick sections and photographed with a Leica DM  
417 LB2 microscope system by using by using C PLAN 4x/0.10, C PLAN 10x/0.22 and C PLAN 20x/0.40  
418 objectives.

#### 419 **Six2+ cell counting**

420 The E13.5 ( $n=7-9$ ) and E15.5 ( $n=2-6$ ) Six2-TROMA-1 stained kidneys were embedded in 1 % low melting  
421 agar (50100; Lonza Group). The lateral cortex of the kidneys was imaged with a Nikon A1R MP+ multiphoton  
422 microscope (Tokyo, Japan) by using CFI75 Apochromat 25x/1.1 W 1300 objective and the NIS-Elements C-  
423 ER 4.6. (Nikon) program. Excitation wavelengths for Six2 and TROMA-1 stainings were set to 920nm and  
424 1040nm. Collected emission wavelengths were 495nm-511nm for Six2 and 593nm LP for TROMA-1. The  
425 voxel size was set to 0.5 $\mu$ m(x)\*0.5 $\mu$ m(y)\*0.5 $\mu$ m(z). The images were deconvolved with the Huygens  
426 Professional version 17.10 (Scientific Volume Imaging, Hilversum, the Netherlands) and further processed  
427 with ImageJ/Fiji to crop each nephrogenic niche to separate areas.

428 The Six2+ cells were calculated from the cropped images by a program made with MATLAB R2017a (The  
429 MathWorks, Natick, Massachusetts, USA) for this purpose. The program pre-processed images using Hessian  
430 ridge enhancement (Hodneland et al., 2009) and H-minima transformation (Meyer, 1994). Ridge enhancement  
431 increased the cell membrane intensity and reduced the cytoplasmic fluorescence, while the H-minima  
432 transformation removed small dark regions inside cells. The pre-processed images were then segmented using  
433 Watershed transformation (Soille, 1999).

434



## 435 **OPT and branching analysis**

436 The TROMA-1 ( $n=7-13$ ), and podocin ( $n=13-17$ ) stained and Wnt11 *in situ* hybridised ( $n=6-18$ ) samples  
437 collected at least two different litters were prepared for OPT as previously described and scanned with the  
438 OPT Scanner 3001M (Bioptonic Microscopy, UK) (Chi et al., 2011; Short, Hodson, & Smyth, 2010).  
439 Excitation wavelengths for TROMA-1 and podocin were set to 540-580 nm. Collected emission wavelengths  
440 were 590-670 nm. Wnt11 *in situ* hybridized kidneys were imaged with bright field illumination. Pixel size was  
441 set to 3.5  $\mu\text{m}$  for Wnt11 *in situ* hybridized kidneys, 7  $\mu\text{m}$  for E15.5 TROMA-1 and podocin stained kidneys  
442 and 3.15  $\mu\text{m}$  for E13.5 TROMA-1 stained kidneys. The obtained data were reconstructed with the Skyscan  
443 NRecon v1.6.9.4. software (Bruker, Kontich, Belgium) and analysed with Imaris software (Bitplane, Zurich  
444 Switzerland) as earlier reported (Chi et al., 2011; Pietilä et al., 2016; Short et al., 2010).

445 The following analysis were made with Imaris software (Bitplane, Zurich, Switzerland) from OPT imaged  
446 kidneys. The kidney volume calculations were made by measuring the x-, y- and z-axis of the kidneys crossing  
447 in the middle and approximating the volume of kidney as an ellipsoid. To calculate the volume of the kidney,  
448  $4/3\pi abc$  (where  $a=x\text{-axis}/2$ ,  $b=z\text{-axis}/2$  and  $c=y\text{-axis}/2$ ) formula was used. The morphogenesis of the ureteric  
449 tree was assessed with the filament-tracing tool and the number of the positive ureteric tips from Wnt11  
450 hybridised kidneys as well as the number of podocin-positive glomeruli with spot tracing-tool. From the  
451 filament data (schematic picture in Fig. 7 – figure supplement 1a), the values of branching angle B (measures  
452 the angle between the root branch and extending branch points), terminal branch points (reflecting the number  
453 of the ureteric tips), branching level (indicating the number of bifurcational branching events) and filament  
454 dendrite length (indicating the sum of all tubules counted together) were used to analyse the morphology of  
455 the ureteric tree.

456 Whole-mount E11.5 ( $n=5-11$ ) and E12.5 ( $n=11$ ) kidneys were stained against TROMA-1. E11.5 kidneys were  
457 embedded to 1% low melting agar and imaged with Zeiss AxioScope.A1 microscope (Carl Zeiss, Jena,  
458 Germany) by using Olympus UMPLFLN 10X/0.3 W objective with excitation wavelengths 540-580 nm and  
459 emission wavelengths 590-670 nm. E12.5 kidneys were imaged with an Olympus BX51WI microscope  
460 (Olympus Corporation, Tokyo, Japan) by using U-PlanFI 4x/0.13 objective with 555 nm excitation and long  
461 pass emission collection, and CellM Software (Olympus Corporation). The number of tips were counted with

462 ImageJ/Fiji.

### 463 **Counting of glomeruli and proliferating cells**

464 For glomerular counting, 7- $\mu$ m thick sections were prepared of paraffin-embedded whole E16.5 kidneys ( $n=4$ –  
465 5 kidney pairs), haematoxylin-eosin stained, and photographed with an Aperio AT 2 Leica Scanner and an  
466 Aperio Scan Scope Console program (Leica, Wetzlar, Germany) available at the Northern Finland Biobank  
467 Borealis. The glomeruli and glomerular precursors were calculated from every fifth section of the serial  
468 sectioned kidneys using QuPath v0.1.2 (The Queen’s University of Belfast, Northern Ireland). The cells  
469 positive for Ki67 were calculated from the cell population positive for Six2 in the next section which each  
470 surrounded one tip positive for TROMA1 using ImageJ/Fiji. Three different kidneys from two different litters  
471 per genotype and timepoint were used in Ki67 analyses.

### 472 **Flow cytometry**

473 For flow cytometry, the E13.5 dams were injected intraperitoneally with 200  $\mu$ l of 5-bromo-2'-deoxyuridine  
474 (BrDU) (552598, BD Pharmingen) early in the morning and the embryonic kidneys were collected 2.5 hours  
475 later. The kidneys of one litter ( $n=5$ -10 embryos per litter) were pooled together to present one sample. Five  
476 WT litters and seven KO litters were separately analysed. The cells were dissociated with Collagenase Type I  
477 (CLS-1, Worthington Biochemical Corporation) and Type IV (CLS-4, Worthington Biochemical  
478 Corporation), and DNase I (M0303S, New England Biolabs) in physiological buffer at + 37°C. The enzyme  
479 activity was stopped with fetal bovine serum (FBS) followed by the fixation and staining with the APC BrDU  
480 Flow Kit – Part A (552598, BD Pharmingen) according to the manufacturer’s recommendation with some  
481 exceptions. Together with BrDU, Six2 antibody was added (1:100) and incubated 40 min at room temperature.  
482 After washing, the secondary antibody goat anti-rabbit Alexa Fluor 488 was added (1:200) and incubated  
483 another 30 min. One drop of DAPI (R37606, Invitrogen) was added to the cell suspension couple of minutes  
484 before the analysis with BD FACSAria™ III sorter (BD Bioscience, New Jersey, USA).

485 For E15.5 and E17.5 flow cytometry, kidneys from at least three different litters ( $n=6$ -9 embryos per litter)  
486 were passed through a cell mesh (352340; Falcon 40  $\mu$ m Cell Strainer, Corning) and fixed with absolute  
487 ethanol at –20 °C. To ensure that the difference in the method how the cells were dissociated at different time

488 points would not cause false results, some E15.5 WT and KO were also enzymatically dissociated and labelled  
489 with BrDU and Six2 (Fig. 16). The results obtained by dissociating cells enzymatically or passing through the  
490 strainer were similar and the results obtained using the cell mesh are shown. The Six2 antibody and a goat  
491 anti-rabbit Alexa Fluor 647 (ab150079; Abcam) secondary antibody was used to detect the NPCs. The cell  
492 cycle analyses of the stained cells were performed with a flow cytometry, where 5-11 independent acquisitions  
493 per sample were done (FACSCalibur; BD Biosciences, Erembodegem, Belgium).

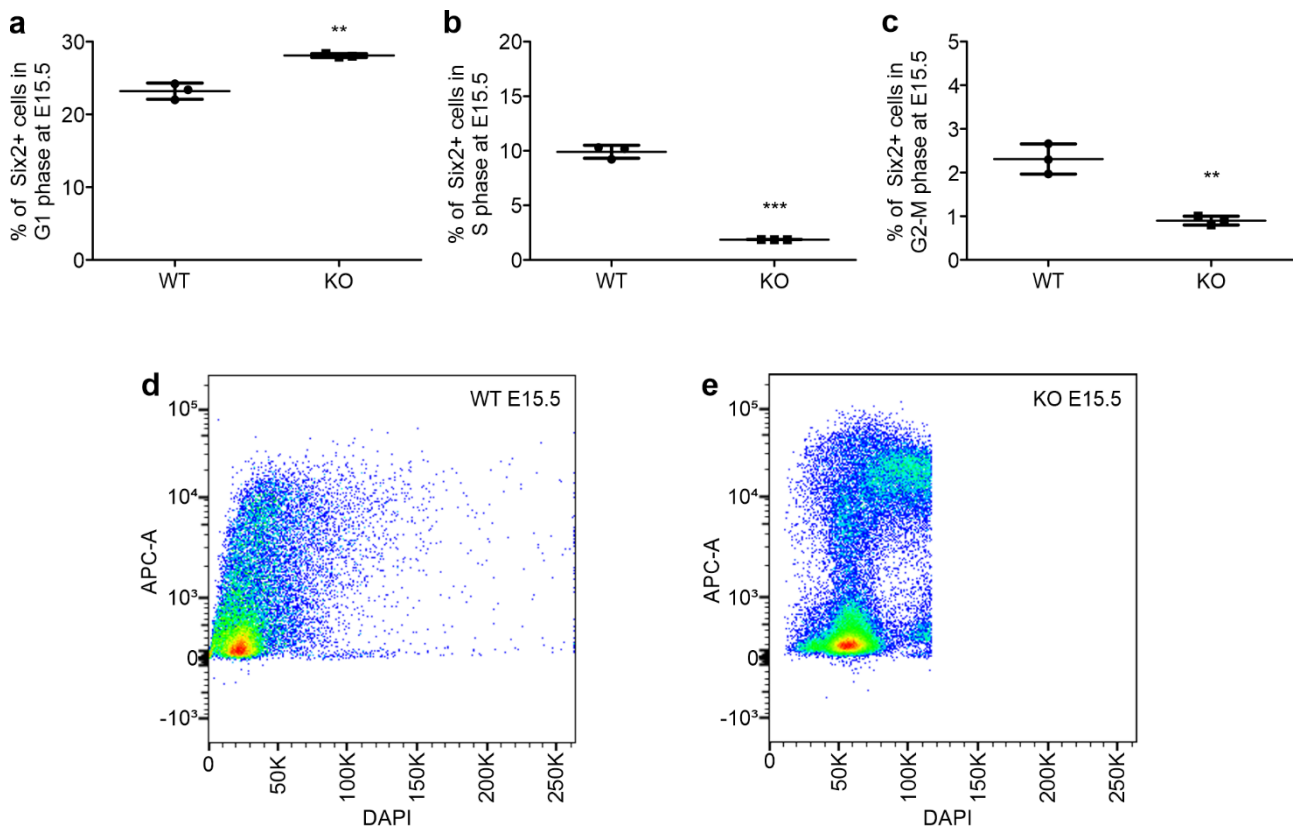

**Figure 16. The cell dissociation method did not affect to the E15.5 cell cycle results.** The enzymatic dissociation of the cells from E15.5 kidneys were labelled with BrDU and Six2. The results of the cell cycle analyses indicated that in the KOs the Six2+ cells were significantly more often in the G1 phase (a) and significantly less in the G2-M phase (c) when compared with the WTs. Similar results were detected in the analyses of the E15.5 where the kidneys were passed through the cell mesh. However, in these analyses there seemed to be significantly less Six2+ cells in the S-phase in the KOs when compared with the WTs (b). Representative images of the cell cycle analysis of the WT (d) and KO (e) kidneys. N(WT)=3, n(KO)=3 analyses, where kidneys of one litter are pooled together. In graphs, mean±s.d. is shown. \*\*P<0,01, \*\*\*P<0,0001 (Mann-Whitney U -test).

## 494 **qPCR**

495 RNA isolation, cDNA production and assays were performed as described (Aikio et al., 2014). The relative  
496 RNA levels were calculated with Bio-Rad CFX Manager 3.1 software using the  $\Delta\Delta Cq$  method. The used  
497 primers were for ColXVIII (recognising all isoforms) 5'-AGGACTTTCAGCCAGTGCT-3' and 5'-  
498 AAATCTGCTCCACGGATA-3, and for ColXVIII short isoform 5'-GGATGTGCTCACCAGTTTG-3' and  
499 5'-CATCGATTTGTGAGATCTTC-3'. For normalisation, primers for 18S (5'-  
500 GCAATTATTCCCCATGAACG-3' and 5'-GGCCTCACTAAACCATCCAA-3') were used.  $N=14-22$   
501 kidney pairs were pooled for ColXVIII E11.5 analyses.

## 502 **Organ culture**

503 The AGM region of E10.5-11.0 (39-47 somites) embryos ( $n=15-16$ ) from *Rosa26<sup>YFP</sup>*; *Wnt4<sup>EGFP<sup>Cre</sup></sup>* modified  
504 WT, or *Col18a1<sup>-/-</sup>* mice were dissected, and YFP-positive embryos were selected for further processing. The  
505 cultures were set up as described by Saarela *et al.* using Cultrex (3445-005-01; Trevigen) (Saarela, U., Akram,  
506 Desgrange, Rak-Raszewska, Shan, Cereghini, Ronkainen, Heikkilä, Skovorodkin, & Vainio, 2017a). The time-  
507 lapse images were captured at 0.5 or 1 h intervals by the Zeiss LSM780 confocal microscope by using i LCI  
508 Plan-Neofluar 25x/0.8 W objective and a Zen 2012 (black edition) program or by a Leica SP8 FALCON by  
509 using HC PL APO 10x/0.40 objective and a LAS X v3.5.6 program (Leica Microsystems GmbH, Wezlar,  
510 Germany), which were also used to process and analyse the data. Environmental conditions (+37°C, 5% CO<sub>2</sub>)  
511 in time-lapse experiments were maintained by Okolab Bold Line on stage incubators (Okolab, Pozzuoli, Italy).  
512 The N-terminal fragment of ColXVIII (Aikio et al., 2014) and TSP1-like recombinant fragment (Zaferani et  
513 al., 2014) were produced and purified as previously described. The full N-terminal fragment was applied to  
514 E11.5 kidney cultures at a concentration of 500 ng/ml ( $n=3-4$ ) or 1000 ng/ml ( $n=6-8$ ) at the beginning of the  
515 culturing, and controls ( $n=5-7$ ) were cultured in medium without the fragment. Likewise, the TSP1-like  
516 fragment was applied to E11.5 at a concentration of 200 ng/ml ( $n=9-16$ ) or 500 ng/ml ( $n=8-16$ ), and controls  
517 ( $n=8-12$ ) were cultured in medium without the fragment. The following antibodies were used for function  
518 blocking studies ( $n=9-18$ ): 25  $\mu$ g/ml of an anti-integrin  $\alpha 3$  antibody, (MAB1952Z; Merck Millipore), 25  $\mu$ g/ml  
519 of a mouse IgG1 monoclonal antibody (NCG01) (ab81032; Abcam), 5  $\mu$ g/ml of a NA/LE hamster anti-mouse



520 CD29 clone HM  $\beta$ 1-1 (562219; BD Bioscience), and 5  $\mu$ g/ml of a NA/LE hamster IgG2 (553961; BD  
521 Pharmingen).

522 To perform fragment cultures with E11.5 kidneys, a nucleopore filter with the kidney primordium was placed  
523 on top in a trowel grid, cultured for 96 h in medium (DMEM, 10% FBS, 1% streptomycin, penicillin), and  
524 incubated in a humidified atmosphere at 37°C with 5% CO<sub>2</sub>. To titrate the ColXVIII fragment concentration  
525 for the experiment, 25, 50, 100, 500, and 1000 ng/ml concentrations of the fragment were used in culture  
526 medium and changed every 48 h. A clear effect in the growth was detected at 500 ng/ml, and it was used  
527 together with 1000 ng/ml in the final experiments. The function blocking studies were performed similarly to  
528 the fragment cultures by adding either integrin  $\alpha$ 3 or  $\beta$ 1 antibody alone or together with N-terminal fragment  
529 1000 ng/ml, and for controls, adding IgG alone or with the N-terminal fragment 1000 ng/ml. After culture, the  
530 kidney primordia were fixed in 4% paraformaldehyde (PFA) and processed for whole-mount-immunostaining  
531 with TROMA-1 and Pax-2 (PRB-276P; Covance) antibodies as described by Saarela *et al.* 2017 (Saarela, U.,  
532 Akram, Desgrange, Rak-Raszewska, Shan, Cereghini, Ronkainen, Heikkilä, Skovorodkin, & Vainio, 2017b).

### 533 **Sequence alignment and protein structure prediction**

534 Protein sequences for mouse and human TSP1 and ColXVIII TSP1-like domain (Laminin G-like) were  
535 retrieved from Uniprot (The UniProt Consortium, 2019). Sequence alignment was carried out using Clustal  
536 Omega (Sievers et al., 2011) with default settings.

537 A homology model for ColXVIII TSP1 domain was generated with PHYRE2 (Kelley et al., 2015) intensive  
538 modeling mode. The mouse ColXVIII TSP1-like domain sequence (The UniProt Consortium, 2019) was  
539 submitted for modelling, returning a model based on the crystal structure of the N-terminal domain of collagen  
540 IX (PDB code 2UUR). The model had a confidence score of 100 % with 92 % coverage demonstrating an  
541 appropriate model. The superimposed image was created using PyMOL (Schrödinger L.L.C. The PyMOL  
542 Molecular Graphics System. Schrödinger; New York, NY, USA: 2009. version 1.2r3pre.).

### 543 **Statistical analyses**

544 The statistical analyses were performed with the GraphPad Prism 5 program (GraphPad Software, San Diego,  
545 California, USA). The Mann-Whitney U test, with eventual Welch's correction where requested, was used to

546 calculate statistical significances between two groups, and the Kruskal-Wallis test with Dunn's multiple  
547 comparison test was used to compare multiple groups. Values were considered as significant at P-values less  
548 than 0.05. In the box plots, whiskers indicate minimum and maximum values, the box borders indicate the  
549 lower and upper quarters and the line in the middle of the box the mean value. In the dot plots, whiskers  
550 indicate standard deviation (s.d.) and line in the middle the mean value. In the columns, mean is shown with  
551 whiskers indicating s.d.

552

### 553 **ACKNOWLEDGEMENTS**

554 The authors wish to thank the Laboratory Animal Centre of the University of Oulu, Biocenter Oulu transgenic  
555 core facility, a member of Biocenter Finland and Infrafrontier-EMMA, Biocenter Oulu Light microscopy core  
556 facility, a member of Biocenter Finland biological imaging platform services, Biocenter Oulu Virus core  
557 facility and Vimma service of the University of Oulu, as well as Aila White, Sirkka Vilmi, Maija Seppänen,  
558 Jaana Peters and Päivi Tuomaala for their technical assistance.

559

### 560 **FUNDING**

561 The study has been supported by Biocenter Finland, the Instrumentarium Science Foundation, the Finnish  
562 Cultural Foundation, the Finnish Medical Foundation, the Finnish Kidney Association, the Jane and Aatos  
563 Erkko Foundation, the Academy of Finland (grant number 308867) and the Sigríd Jusélius Foundation. F.N.  
564 was supported by a fellowship from the Academy of Finland (243014583) and the Finnish Cultural Foundation.  
565 S.V. was supported by the Academy of Finland (24100249) and the Sigríd Jusélius Foundation.

566 **COMPETING INTERESTS**

567 No competing interests declared.

568

569 **AUTHOR CONTRIBUTIONS**

570 M.M.R-J. and H.J.R. carried out experiments and analysed the data. M.M.R-J., F.N., H.J.R. and T.A.P.  
571 designed the study. F.N. performed the N-terminal fragment cultures, part of the cell cycle analyses and  
572 dissected and prepared E10.5 AGMs for cultures and E11.5 MMs for qPCR. S.U.A. developed the computer  
573 program for counting Six2+ cells. J.T.K. performed the sequence alignment and protein structure modelling.  
574 T.S. designed and produced the ColXVIII antibody. I.P. provided OPT analysis support. H.P.E. designed  
575 ColXVIII *in situ* probes and N-terminal recombinant proteins. I.V. helped with flow cytometry analysis. V-  
576 P.R. helped with microscopy imaging. I.K. produced and purified the N-terminal fragment. A.M. and S.J.V.  
577 provided advice on study design. M.M.R-J. made the figures and M.M.R-J., F.N., T.A.P. and H.J.R. wrote the  
578 paper. All authors approved the final version of the manuscript.

579 **REFERENCES**

- 580 Aikio, M., Elamaa, H., Vicente, D., Izzi, V., Kaur, I., Seppinen, L., . . . Pihlajaniemi, T. (2014).  
581 Specific collagen XVIII isoforms promote adipose tissue accrual via mechanisms determining  
582 adipocyte number and affect fat deposition. *Proceedings of the National Academy of Sciences*,  
583 *111*(30), E3043-E3052. doi:10.1073/pnas.1405879111
- 584 Aikio, M., Hurskainen, M., Brideau, G., Hägg, P., Sormunen, R., Heljasvaara, R., . . . Pihlajaniemi,  
585 T. (2013). Collagen XVIII short isoform is critical for retinal vascularization, and overexpression  
586 of the tsp-1 domain affects eye growth and cataract formation. *Investigative Ophthalmology &*  
587 *Visual Science*, *54*(12), 7450. doi:10.1167/iovs.13-13039
- 588 Andrew, D. J., & Ewald, A. J. (2010). Morphogenesis of epithelial tubes: Insights into tube formation,  
589 elongation, and elaboration. *Developmental Biology*, *341*(1), 34-55.  
590 doi:10.1016/j.ydbio.2009.09.024
- 591 Bishop, J. R., Passos-Bueno, M. R., Fong, L., Stanford, K. I., Gonzales, J. C., Yeh, E., . . . Moulton,  
592 K. S. (2010). Deletion of the basement membrane heparan sulfate proteoglycan type XVIII  
593 collagen causes hypertriglyceridemia in mice and humans. *PloS One*, *5*(11), e13919.  
594 doi:10.1371/journal.pone.0013919
- 595 Caglayan, A. O., Baranoski, J., F, Aktar, F., Han, W., Tuysuz, B., Guzel, A., . . . Gunel, M. (2014).  
596 Brain malformations associated with knobloch Syndrome—Review of literature, expanding  
597 clinical spectrum, and identification of novel mutations. *Pediatric Neurology*, *51*(6), 806-813.e8.  
598 doi:10.1016/j.pediatrneurol.2014.08.025
- 599 Calzada, M. J., Annis, D. S., Zeng, B., Marcinkiewicz, C., Banas, B., Lawler, J., . . . Roberts, D. D.  
600 (2004). Identification of novel  $\alpha 1$  integrin binding sites in the type 1 and type 2 repeats of



- 601 thrombospondin-1. *The Journal of Biological Chemistry*, 279(40), 41734-41743.  
602 doi:10.1074/jbc.M406267200
- 603 Carroll, T. J., Park, J., Hayashi, S., Majumdar, A., & McMahon, A. P. (2005). Wnt9b plays a central  
604 role in the regulation of mesenchymal to epithelial transitions underlying organogenesis of the  
605 mammalian urogenital system. *Developmental Cell*, 9(2), 283-292.  
606 doi:10.1016/j.devcel.2005.05.016
- 607 Cebrian, C., Asai, N., D'Agati, V., & Costantini, F. (2014). The number of fetal nephron progenitor  
608 cells limits ureteric branching and adult nephron endowment. *Cell Reports*, 7(1), 127-137.  
609 doi:10.1016/j.celrep.2014.02.033
- 610 Cebrián, C., Borodo, K., Charles, N., & Herzlinger, D. A. (2004). Morphometric index of the  
611 developing murine kidney. *Developmental Dynamics : An Official Publication of the American*  
612 *Association of Anatomists*, 231(3), 601. Retrieved from  
613 <https://www.ncbi.nlm.nih.gov/pubmed/15376282>
- 614 Chandrasekaran, L., He, C., Al-Barazi, H., Krutzsch, H. C., Iruela-Arispe, M. L., & Roberts, D. D.  
615 (2000). Cell contact-dependent activation of  $\alpha 3 \beta 1$  integrin modulates endothelial cell responses  
616 to thrombospondin-1. *Molecular Biology of the Cell*, 11(9), 2885-2900.  
617 doi:10.1091/mbc.11.9.2885
- 618 Chi, L., Saarela, U., Railo, A., Prunskaitė-Hyyryläinen, R., Skovorodkin, I., Anthony, S., . . . Vainio,  
619 S. J. (2011). A secreted BMP antagonist, Cer1, fine tunes the spatial organization of the ureteric  
620 bud tree during mouse kidney development. *PloS One*, 6(11), e27676.  
621 doi:10.1371/journal.pone.0027676

- 622 Chi, L., Zhang, S., Lin, Y., Prunskaitė-Hyyryläinen, R., Vuolteenaho, R., Itäranta, P., & Vainio, S.  
623 (2004). Sprouty proteins regulate ureteric branching by coordinating reciprocal epithelial Wnt11,  
624 mesenchymal gdnf and stromal Fgf7 signalling during kidney development. *Development*,  
625 *131*(14), 3345. doi:10.1242/dev.01200
- 626 Costantini, F., & Kopan, R. (2010). Patterning a complex organ: Branching morphogenesis and  
627 nephron segmentation in kidney development. *Developmental Cell*, *18*(5), 698-712.  
628 doi:10.1016/j.devcel.2010.04.008
- 629 DeFreitas, M. F., Yoshida, C. K., Frazier, W. A., Mendrick, D. L., Kypta, R. M., & Reichard, L. F.  
630 (1995). Identification of integrin  $\alpha 3\beta 1$  as a neuronal thrombospondin receptor mediating neurite  
631 outgrowth. *Neuron*, *15*(2), 333-343. doi:10.1016/0896-6273(95)90038-1
- 632 Djudjaj, S., Papatirou, M., Bülow, R. D., Wagnerova, A., Lindenmeyer, M. T., Cohen, C. D., . . .  
633 Boor, P. (2016). Keratins are novel markers of renal epithelial cell injury. *Kidney International*,  
634 *89*(4), 792-808. doi:10.1016/j.kint.2015.10.015
- 635 Elamaa, H., Snellman, A., Rehn, M., Autio-Harmanen, H., & Pihlajaniemi, T. (2003).  
636 Characterization of the human type XVIII collagen gene and proteolytic processing and tissue  
637 location of the variant containing a frizzled motif. *Matrix Biology : Journal of the International*  
638 *Society for Matrix Biology*, *22*(5), 427-442. doi:10.1016/S0945-053X(03)00073-8
- 639 Furrer, J., Luy, B., Basrur, V., Roberts, D. D., & Barchi, J. J. (2006). Conformational analysis of an  
640  $\alpha 3\beta 1$  integrin-binding peptide from thrombospondin-1: Implications for antiangiogenic  
641 drug design. *Journal of Medicinal Chemistry*, *49*(21), 6324-6333. doi:10.1021/jm060833l

- 642 Halfter, W., Dong, S., Schurer, B., & Cole, G. J. (1998). Collagen XVIII is a basement membrane  
643 heparan sulfate proteoglycan. *The Journal of Biological Chemistry*, 273(39), 25404-25412.  
644 doi:10.1074/jbc.273.39.25404
- 645 Halt, K., & Vainio, S. (2014). Coordination of kidney organogenesis by wnt signaling. *Pediatric*  
646 *Nephrology*, 29(4), 737-744. doi:10.1007/s00467-013-2733-z
- 647 Hendaoui, I., Lavergne, E., Lee, H., Hong, S. H., Kim, H., Parent, C., . . . Musso, O. (2012). Inhibition  
648 of wnt/ $\beta$ -catenin signaling by a soluble collagen-derived frizzled domain interacting with Wnt3a  
649 and the receptors frizzled 1 and 8. *PloS One*, 7(1), e30601. doi:10.1371/journal.pone.0030601
- 650 Hodneland, E., Bukoreshtliev, N. V., Eichler, T. W., Tai, X., Gurke, S., Lundervold, A., & Gerdes,  
651 H. (2009). A unified framework for automated 3-d segmentation of surface-stained living cells  
652 and a comprehensive segmentation evaluation. *IEEE Transactions on Medical Imaging*, 28(5),  
653 720-738. doi:10.1109/TMI.2008.2011522
- 654 Karihaloo, A., Karumanchi, S. A., Barasch, J., Jha, V., Nickel, C. H., Yang, J., . . . Cantley, L. G.  
655 (2001). Endostatin regulates branching morphogenesis of renal epithelial cells and ureteric bud.  
656 *Proceedings of the National Academy of Sciences of the United States of America*, 98(22), 12509-  
657 12514. doi:10.1073/pnas.221205198
- 658 Kaur, I., Ruskamo, S., Koivunen, J., Heljasvaara, R., Lackman, J. J., Izzi, V., . . . Pihlajaniemi, T.  
659 (2018). The N-terminal domain of unknown function (DUF959) in collagen XVIII is intrinsically  
660 disordered and highly O-glycosylated. *The Biochemical Journal*, 475(22), 3577-3593.  
661 doi:10.1042/BCJ20180405

- 662 Kazerounian, S., Yee, K. O., & Lawler, J. (2008). Thrombospondins in cancer. *Cellular and*  
663 *Molecular Life Sciences* : *CMLS*, 65(5), 700. Retrieved from  
664 <https://www.ncbi.nlm.nih.gov/pubmed/18193162>
- 665 Kelley, L. A., Mezulis, S., Yates, C. M., Wass, M. N., & Sternberg, M. J. E. (2015). The Phyre2 web  
666 portal for protein modeling, prediction and analysis. *Nature Protocols*, 10(6), 845-858.  
667 doi:10.1038/nprot.2015.053
- 668 Kinnunen, A., Sormunen, R., Elamaa, H., Seppinen, L., Miller, R. T., Ninomiya, Y., . . . Pihlajaniemi,  
669 T. (2011). Lack of collagen XVIII long isoforms affects kidney podocytes, whereas the short  
670 form is needed in the proximal tubular basement membrane. *The Journal of Biological*  
671 *Chemistry*, 286(10), 7755-7764. doi:10.1074/jbc.M110.166132
- 672 Kirita, Y., Kami, D., Ishida, R., Adachi, T., Tamagaki, K., Matoba, S., . . . Gojo, S. (2016). Preserved  
673 nephrogenesis following partial nephrectomy in early neonates. *Scientific Reports*, 6(1), 26792.  
674 doi:10.1038/srep26792
- 675 Kobayashi, A., Valerius, M. T., Mugford, J. W., Carroll, T. J., Self, M., Oliver, G., & McMahon, A.  
676 P. (2008). Six2 defines and regulates a multipotent self-renewing nephron progenitor population  
677 throughout mammalian kidney development. *Cell Stem Cell*, 3(2), 169-181.  
678 doi://doi.org/10.1016/j.stem.2008.05.020
- 679 Kohfeldt, E., Maurer, P., Vannahme, C., & Timpl, R. (1997). Properties of the extracellular calcium  
680 binding module of the proteoglycan testican. *FEBS Letters*, 414(3), 557-561.
- 681 Kreidberg, J. A., Donovan, M. J., Goldstein, S. L., Rennke, H., Shepherd, K., Jones, R. C., & Jaenisch,  
682 R. (1996). Alpha 3 beta 1 integrin has a crucial role in kidney and lung organogenesis.



- 683 *Development* (Cambridge, England), 122(11), 3537. Retrieved from  
684 <http://dev.biologists.org/content/122/11/3537.abstract>
- 685 Krutzsch, H. C., Choe, B. J., Sipes, J. M., Guo, N., & Roberts, D. D. (1999). Identification of an  
686  $\alpha 3\beta 1$  Integrin recognition sequence in thrombospondin-1. *The Journal of Biological Chemistry*,  
687 274(34), 24080-24086. doi:10.1074/jbc.274.34.24080
- 688 Kurtzborn, K., Cebrian, C., & Kuure, S. (2018). Regulation of renal differentiation by trophic  
689 factors. *Frontiers in Physiology*, 9, 1588. doi:10.3389/fphys.2018.01588
- 690 Kurtzborn, K., Kwon, H. N., & Kuure, S. (2019). MAPK/ERK signaling in regulation of renal  
691 differentiation. *International Journal of Molecular Sciences*, 20(7) doi:10.3390/ijms20071779
- 692 Kyriakides, T. R., & Maclachlan, S. (2009). The role of thrombospondins in wound healing,  
693 ischemia, and the foreign body reaction. *Journal of Cell Communication and Signaling*, 3(3-4),  
694 215-225. doi:10.1007/s12079-009-0077-z
- 695 Lawlor, K. T., Zappia, L., Lefevre, J., Park, J., Hamilton, N. A., Oshlack, A., . . . Combes, A. N.  
696 (2019). Nephron progenitor commitment is a stochastic process influenced by cell migration.  
697 *eLife*, 8, e41156. doi:10.7554/eLife.41156
- 698 Lin, Y., Zhang, S., Rehn, M., Itäranta, P., Tuukkanen, J., Heljasvaara, R., . . . Vainio, S. (2001).  
699 Induced repatterning of type XVIII collagen expression in ureter bud from kidney to lung type:  
700 Association with sonic hedgehog and ectopic surfactant protein C. *Development* (Cambridge,  
701 *England*), 128(9), 1573. Retrieved from <http://dev.biologists.org/content/128/9/1573.abstract>
- 702 Little, M. H., & McMahon, A. P. (2012). Mammalian kidney development: Principles, progress, and  
703 projections. *Cold Spring Harbor Perspectives in Biology*, 4(5), a008300.  
704 doi:10.1101/cshperspect.a008300

- 705 Lu, P., Takai, K., Weaver, V. M., & Werb, Z. (2011). Extracellular matrix degradation and  
706 remodeling in development and disease. *Cold Spring Harbor Perspectives in Biology*, 3(12),  
707 a005058. doi:10.1101/cshperspect.a005058
- 708 Lu, P., Weaver, V. M., & Werb, Z. (2012). The extracellular matrix: A dynamic niche in cancer  
709 progression. *The Journal of Cell Biology*, 196(4), 395-406. doi:10.1083/jcb.201102147
- 710 Maimaitiyiming, H., Zhou, Q., & Wang, S. (2016). Thrombospondin 1 deficiency ameliorates the  
711 development of adriamycin-induced proteinuric kidney disease. *PLoS One*, 11(5), e0156144.  
712 doi:10.1371/journal.pone.0156144
- 713 Majumdar, A., Vainio, S., Kispert, A., McMahon, J., & McMahon, A. P. (2003). Wnt11 and ret/gdnf  
714 pathways cooperate in regulating ureteric branching during metanephric kidney development.  
715 *Development (Cambridge, England)*, 130(14), 3175-3185. doi:10.1242/dev.00520
- 716 Meyer, F. (1994). Topographic distance and watershed lines. *Signal Processing*, 38(1), 113-125.  
717 doi:10.1016/0165-1684(94)90060-4
- 718 Muragaki, Y., Timmons, S., Griffith, C. M., Oh, S. P., Fadel, B., Quertermous, T., & Olsen, B. R.  
719 (1995). Mouse Col18a1 is expressed in a tissue-specific manner as three alternative variants and  
720 is localized in basement membrane zones. *Proceedings of the National Academy of Sciences of  
721 the United States of America*, 92(19), 8763-8767. doi:10.1073/pnas.92.19.8763
- 722 Muthukrishnan, S. D., Yang, X., Friesel, R., & Oxburgh, L. (2015). Concurrent BMP7 and FGF9  
723 signalling governs AP-1 function to promote self-renewal of nephron progenitor cells. *Nature  
724 Communications*, 6, 10027. doi:10.1038/ncomms10027

- 725 Oliver, G., Hendrix, J., Lagutin, O. V., Self, M., Dressler, G. R., Bowling, B., & Cai, Y. (2006). Six2  
726 is required for suppression of nephrogenesis and progenitor renewal in the developing kidney.  
727 *The EMBO Journal*, 25(21), 5214-5228. doi:10.1038/sj.emboj.7601381
- 728 Olsen, B. R., Keene, D. R., Eklund, L., Li, E., Tamarkin, L., Ilves, M., . . . Oh, S. P. (2002). Lack of  
729 collagen XVIII/endostatin results in eye abnormalities. *The EMBO Journal*, 21(7), 1535-1544.  
730 doi:10.1093/emboj/21.7.1535
- 731 O'Reilly, M. S., Boehm, T., Shing, Y., Fukai, N., Vasios, G., Lane, W. S., . . . Folkman, J. (1997).  
732 Endostatin: An endogenous inhibitor of angiogenesis and tumor growth. *Cell*, 88(2), 277-285.  
733 doi:10.1016/S0092-8674(00)81848-6
- 734 Passos-Bueno, M. R., Suzuki, O. T., Armelin-Correa, L. M., Sertié, A. L., Errera, F. I. V., Bagatini,  
735 K., . . . Leite, K. R. M. (2006). Mutations in collagen 18A1 and their relevance to the human  
736 phenotype. *Anais Da Academia Brasileira De Ciencias*, 78(1), 123-131. doi:10.1590/S0001-  
737 37652006000100012
- 738 Pietilä, I., Prunskaitė-Hyyryläinen, R., Kaisto, S., Tika, E., Eerde, A. M. v., Salo, A. M., . . . Vainio,  
739 S. J. (2016). Wnt5a deficiency leads to anomalies in ureteric tree development, tubular epithelial  
740 cell organization and basement membrane integrity pointing to a role in kidney collecting duct  
741 patterning. *PloS One*, 11(1), e0147171. doi:10.1371/journal.pone.0147171
- 742 Quélard, D., Lavergne, E., Hendaoui, I., Elamaa, H., Tirola, U., Heljasvaara, R., . . . Musso, O.  
743 (2008). A cryptic frizzled module in cell surface collagen 18 inhibits wnt/ $\beta$ -Catenin signaling.  
744 *PloS One*, 3(4), e1878. doi:10.1371/journal.pone.0001878
- 745 Rehn, M., Hintikka, E., & Pihlajaniemi, T. (1996). Characterization of the mouse gene for the  $\alpha 1$   
746 chain of type XVIII collagen (Col18a1) reveals that the three variant N-terminal polypeptide

- 747 forms are transcribed from two widely separated promoters. *Genomics*, 32(3), 436-446.  
748 doi:10.1006/geno.1996.0139
- 749 Rehn, M., & Pihlajaniemi, T. (1994). Alpha 1(XVIII), a collagen chain with frequent interruptions in  
750 the collagenous sequence, a distinct tissue distribution, and homology with type XV collagen.  
751 *Proceedings of the National Academy of Sciences*, 91(10), 4234-4238.
- 752 Roselli, S., Gribouval, O., Boute, N., Sich, M., Benessy, F., Attié, T., . . . Antignac, C. (2002). Podocin  
753 localizes in the kidney to the slit diaphragm area. *The American Journal of Pathology*, 160(1),  
754 131-139. doi:10.1016/S0002-9440(10)64357-X
- 755 Saarela, J., Rehn, M., Oikarinen, A., Autio-Harmainen, H., & Pihlajaniemi, T. (1998). The short and  
756 long forms of type XVIII collagen show clear tissue specificities in their expression and location  
757 in basement membrane zones in humans. *The American Journal of Pathology*, 153(2), 611-626.  
758 doi:10.1016/S0002-9440(10)65603-9
- 759 Saarela, J., Ylikärppä, R., Rehn, M., Purmonen, S., & Pihlajaniemi, T. (1998). Complete primary  
760 structure of two variant forms of human type XVIII collagen and tissue-specific differences in  
761 the expression of the corresponding transcripts. *Matrix Biology : Journal of the International*  
762 *Society for Matrix Biology*, 16(6), 319-328. doi:10.1016/S0945-053X(98)90003-8
- 763 Saarela, U., Akram, S. U., Desgrange, A., Rak-Raszewska, A., Shan, J., Cereghini, S., . . . Vainio, S.  
764 J. (2017a). Novel fixed z-direction (FiZD) kidney primordia and an organoid culture system for  
765 time-lapse confocal imaging. *Development (Cambridge, England)*, 144(6), 1113.  
766 doi:10.1242/dev.142950
- 767 Saarela, U., Akram, S. U., Desgrange, A., Rak-Raszewska, A., Shan, J., Cereghini, S., . . . Vainio, S.  
768 J. (2017b). Novel fixed z-direction (FiZD) kidney primordia and an organoid culture system for



- 769 time-lapse confocal imaging. *Development (Cambridge, England)*, 144(6), 1113.  
770 doi:10.1242/dev.142950
- 771 Seppinen, L., & Pihlajaniemi, T. (2011). The multiple functions of collagen XVIII in development  
772 and disease. *Matrix Biology : Journal of the International Society for Matrix Biology*, 30(2), 83-  
773 92. doi:10.1016/j.matbio.2010.11.001
- 774 Sertié, A. L., Quimby, M., Moreira, E. S., Murray, J., Zatz, M., Antonarakis, S. E., & Passos-Bueno,  
775 M. R. (1996). A gene which causes severe ocular alterations and occipital encephalocele  
776 (knobloch syndrome) is mapped to 21q22.3. *Human Molecular Genetics*, 5(6), 843-847.  
777 doi:10.1093/hmg/5.6.843
- 778 Shan, J., Jokela, T., Skovorodkin, I., & Vainio, S. (2010). Mapping of the fate of cell lineages  
779 generated from cells that express the Wnt4 gene by time-lapse during kidney development.  
780 *Differentiation*, 79(1), 57-64. doi:10.1016/j.diff.2009.08.006
- 781 Short, K., Combes, A. N., Lefevre, J., Ju, A. L., Georgas, K. M., Lamberton, T., . . . Little, M. H.  
782 (2014). Global quantification of tissue dynamics in the developing mouse kidney. *Developmental*  
783 *Cell*, 29(2), 188-202. doi:10.1016/j.devcel.2014.02.017
- 784 Short, K., Hodson, M. J., & Smyth, I. M. (2010). Tomographic quantification of branching  
785 morphogenesis and renal development. *Kidney International*, 77(12), 1132-1139.  
786 doi:10.1038/ki.2010.42
- 787 Sievers, F., Wilm, A., Dineen, D., Gibson, T. J., Karplus, K., Li, W., . . . Higgins, D. G. (2011). Fast,  
788 scalable generation of high-quality protein multiple sequence alignments using clustal omega.  
789 *Molecular Systems Biology*, 7, 539. doi:10.1038/msb.2011.75

- 790 Skinnider, B. F., Folpe, A. L., Hennigar, R. A., Lim, S. D., Cohen, C., Tamboli, P., . . . Amin, M. B.  
791 (2005). Distribution of cytokeratins and vimentin in adult renal neoplasms and normal renal  
792 tissue: Potential utility of a cytokeratin antibody panel in the differential diagnosis of renal  
793 tumors. *The American Journal of Surgical Pathology*, 29(6), 747-754.
- 794 Soille, P. (1999). *Morphological image analysis: Principles and applications*. Berlin Heidelberg:  
795 Springer-Verlag.
- 796 Tan, K., Duquette, M., Liu, J., Zhang, R., Joachimiak, A., Wang, J., & Lawler, J. (2006). The  
797 structures of the thrombospondin-1 N-terminal domain and its complex with a synthetic  
798 pentameric heparin. *Structure*, 14(1), 33-42. doi:10.1016/j.str.2005.09.017
- 799 The UniProt Consortium. (2019). UniProt: A worldwide hub of protein knowledge. *Nucleic Acids*  
800 *Research*, 47(D1), D506-D515. doi:10.1093/nar/gky1049
- 801 Utriainen, A., Sormunen, R., Kettunen, M., Carvalhaes, L. S., Sajanti, E., Eklund, L., . . . Pihlajaniemi,  
802 T. (2004). Structurally altered basement membranes and hydrocephalus in a type XVIII collagen  
803 deficient mouse line. *Human Molecular Genetics*, 13(18), 2089-2099. doi:10.1093/hmg/ddh213
- 804 Wu, W., Kitamura, S., Truong, D. M., Rieg, T., Vallon, V., Sakurai, H., . . . Nigam, S. K. (2009). B1-  
805 integrin is required for kidney collecting duct morphogenesis and maintenance of renal function.  
806 *American Journal of Physiology - Renal Physiology*, 297(1), 210-217.  
807 doi:10.1152/ajprenal.90260.2008
- 808 Xu, J., Liu, H., Park, J., Lan, Y., & Jiang, R. (2014). Osr1 acts downstream of and interacts  
809 synergistically with Six2 to maintain nephron progenitor cells during kidney organogenesis.  
810 *Development (Cambridge, England)*, 141(7), 1442-1452. doi:10.1242/dev.103283

- 811 Xu, P., Xu, J., Xu, C., Wong, E. M., Cheng, C., Li, J., . . . Jing, D. (2014). Eya1 interacts with Six2  
812 and myc to regulate expansion of the nephron progenitor pool during nephrogenesis.  
813 *Developmental Cell*, 31(4), 434-447. doi:10.1016/j.devcel.2014.10.015
- 814 Zaferani, A., Talsma, D. T., Yazdani, S., Celie, Johanna W. A. M., Aikio, M., Heljasvaara, R., . . .  
815 van den Born, J. (2014). Basement membrane zone collagens XV and XVIII/proteoglycans  
816 mediate leukocyte influx in renal ischemia/reperfusion. *PloS One*, 9(9), e106732.  
817 doi:10.1371/journal.pone.0106732
- 818 Zhang, X., Mernaugh, G., Yang, D., Gewin, L., Srichai, M. B., Harris, R. C., . . . Zent, R. (2009). B1  
819 integrin is necessary for ureteric bud branching morphogenesis and maintenance of collecting  
820 duct structural integrity. *Development (Cambridge, England)*, 136(19), 3357-3366.  
821 doi:10.1242/dev.036269
- 822
- 823

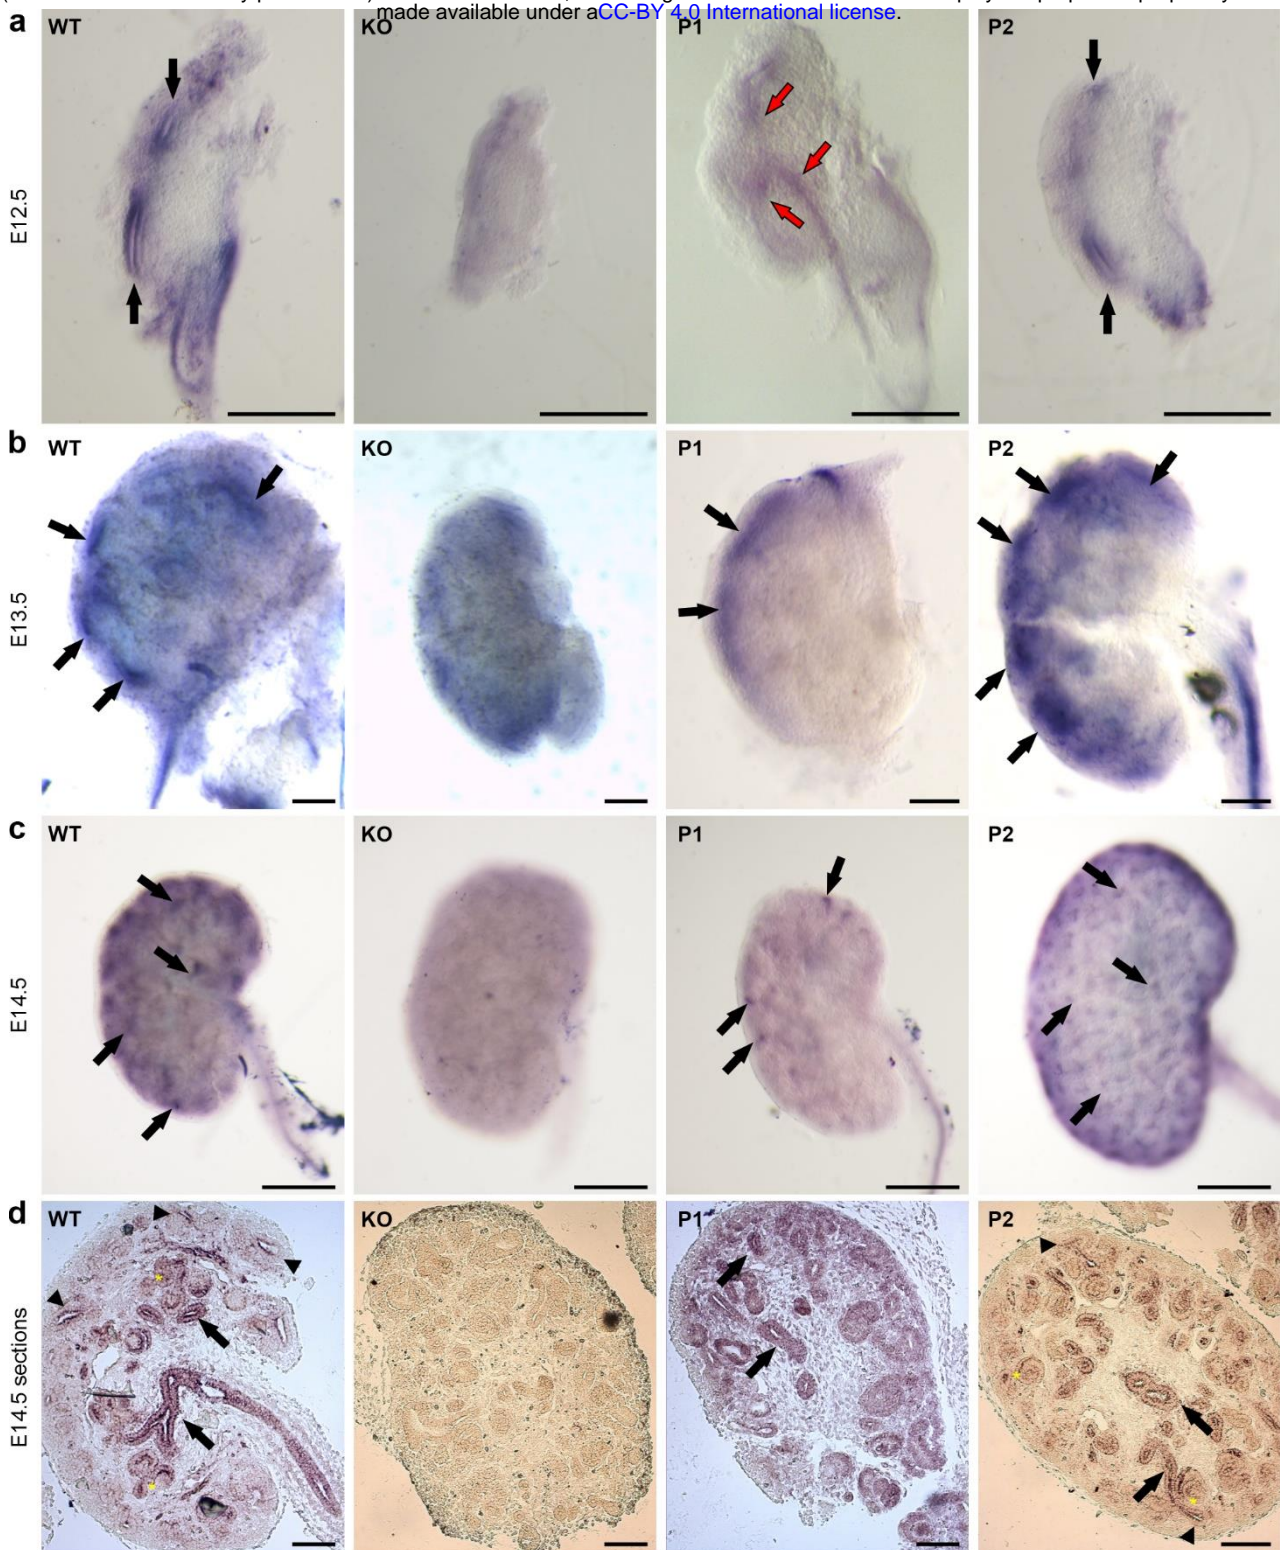



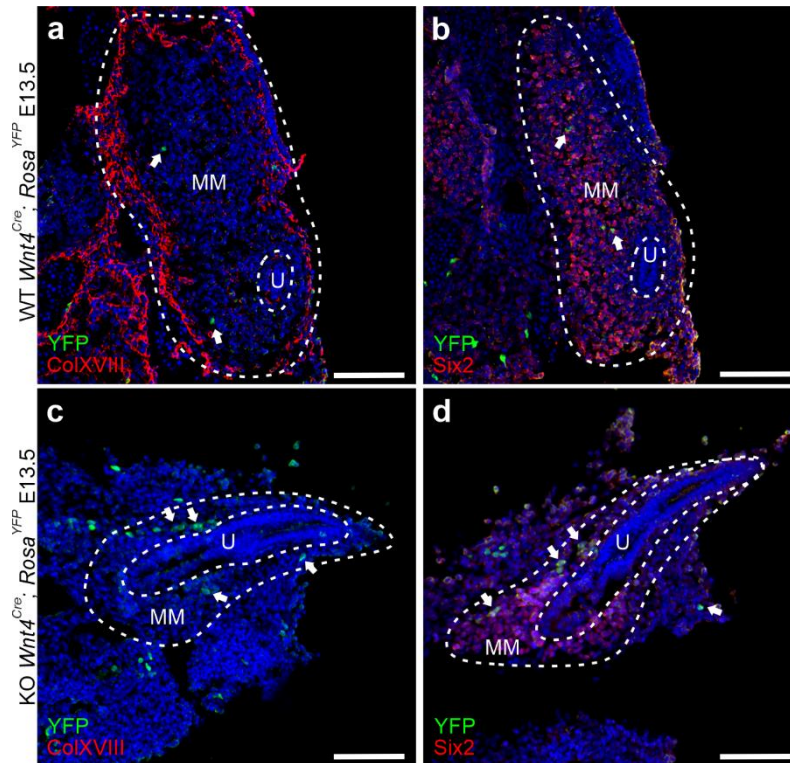

825

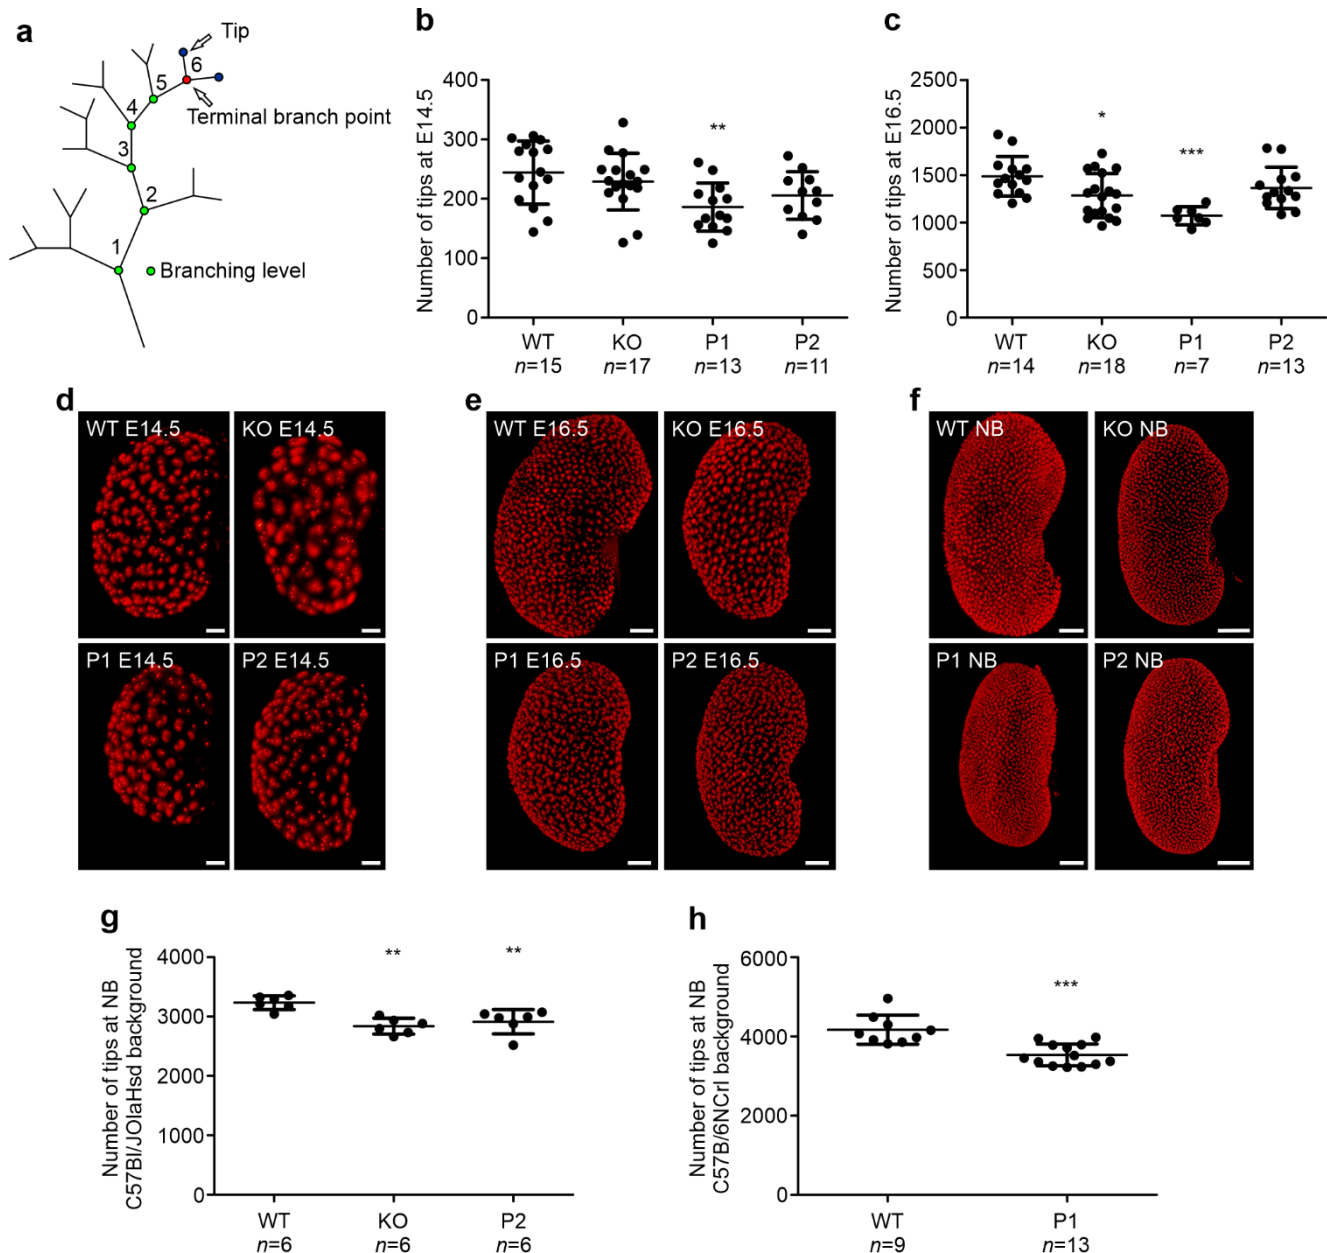

**Figure 7 – figure supplement 1. Lack of ColXVIII or its specific isoforms led to reduced branching during the kidney development.** (a) A schematic image of analysed parameters from TROMA-1 immunostained and Wnt11 *in situ* hybridised kidneys by OPT. (b) The number of ureteric tips at E14.5 of Wnt11 *in situ* hybridised kidneys analysed by OPT;  $n(\text{WT})=15$ ,  $n(\text{KO})=17$ ,  $n(\text{P1})=13$ ,  $n(\text{P2})=11$ . (c) The number of Wnt11-positive ureteric tips at E16.5;  $n(\text{WT})=14$ ,  $n(\text{KO})=18$ ,  $n(\text{P1})=7$ ,  $n(\text{P2})=13$ . (d) Examples of OPT images of Wnt11 *in situ* hybridised (d) E14.5 (bar: 100  $\mu\text{m}$ ), (e) E16.5 (bar: 200  $\mu\text{m}$ ), and (f) new born (NB) mouse (bar: 400  $\mu\text{m}$ ) kidneys used for analysis of the ureteric tip number. (g) The number of ureteric tips in NB WT, KO, and P2 kidneys in a C57Bl/JOlA Hsd background.  $N=6$  per genotype. (h) The number of ureteric tips of NB WT and P1 kidneys in a C57Bl/6NcrJ background.  $N(\text{WT})=9$ ,  $n(\text{P1})=13$ . The NB graphs are shown separately since the background of the mice was changed during the study, and the kidneys in the C57Bl/6NcrJ line were bigger than those in the C57Bl/JOlA Hsd line, but the ratio in the tip number between WT and mutants remained the same. In graphs, means $\pm$ s.d. are shown. \* $P<0.05$ , \*\* $P<0.01$ , and \*\*\* $P<0.001$  (Mann-Whitney U – test).

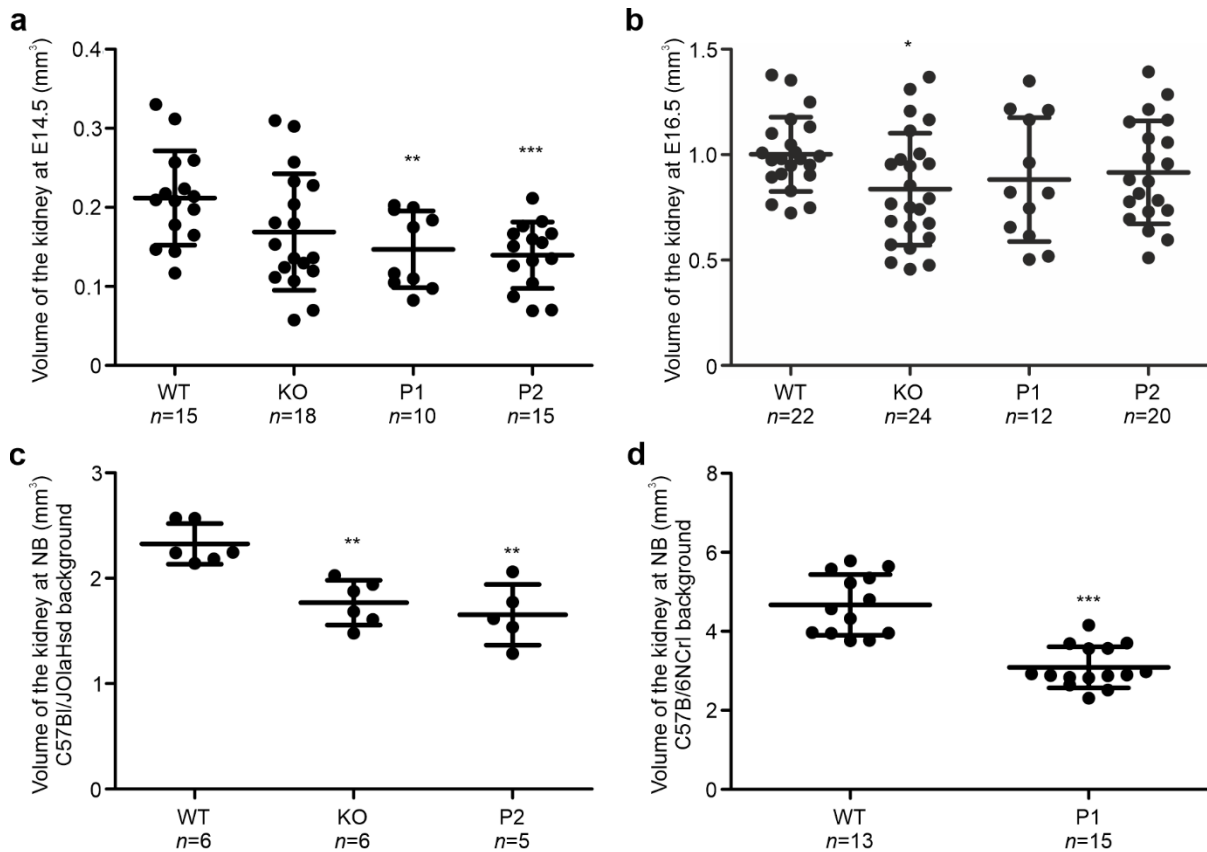

**Figure 7 - figure supplement 2. Kidneys without all ColXVIII forms (KO), the short form (P1), or two longer forms (P2) were smaller than WT kidneys throughout the development.** The volumes of the kidneys were calculated from Wnt11 *in situ* hybridisation and OPT. WT and ColXVIII mutant kidneys in a C57Bl/JOlA<sup>Hsd</sup> background at (a) E14.5 ( $n(\text{WT})=15$ ,  $n(\text{KO})=18$ ,  $n(\text{P1})=10$ ,  $n(\text{P2})=15$ ), (b) E16.5 ( $n(\text{WT})=22$ ,  $n(\text{KO})=24$ ,  $n(\text{P1})=12$ ,  $n(\text{P2})=20$ ), and (c) NB ( $n(\text{WT})=6$ ,  $n(\text{KO})=6$  and  $n(\text{P2})=5$ ). (d) The volume of the NB WT and P1 kidneys in a C57Bl/6NCrI background,  $n(\text{WT})=13$ ,  $n(\text{KO})=15$ . The NB graphs are shown separately since the kidneys in the C57Bl/6NCrI line were bigger than those in the C57Bl/JOlA<sup>Hsd</sup> line even if the difference between WT and mutants remained the same. In graphs, means $\pm$ s.d. are shown. \* $P<0.05$ , \*\* $P<0.01$ , and \*\*\* $P<0.001$  (Mann-Whitney U -test).

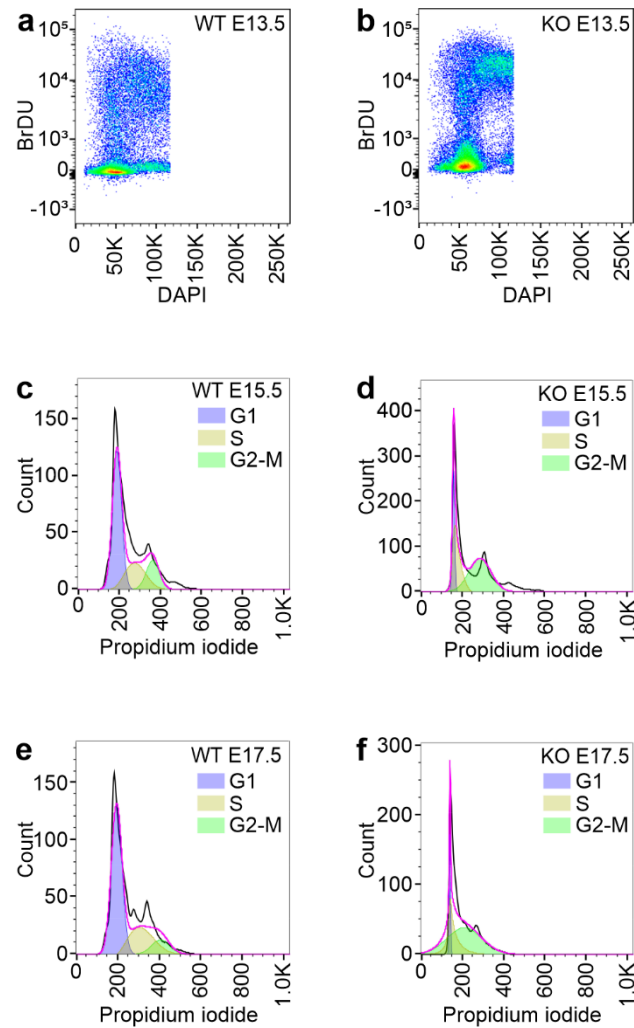

**Figure 9 – figure supplement 1. Representative images of cell cycle analyses of *Six2*-positive cells.** Representative images of the *Six2*<sup>+</sup> cell cycle analyses of the E13.5 WT (a) and KO (b) kidneys, E15.5 WT (c) and KO (d) kidneys, and E17.5 WT (e) and KO (f) kidneys. BrDU= 5-bromo-2'-deoxyuridine.

828

829 **Movie captions**

830

831 **Movie 1. A representative time-lapse video of the WT aorta-gonad-mesonephros (AGM) culture.** The  
832 AGMs are oriented horizontally, where the limb end is on left. One kidney forms in the middle upper part of  
833 the AGM, where the outgrowth of the ureter bud can be seen 9 h onwards. To the lower part forms three  
834 kidneys next to each other. The YFP signal is detected in the MM around 10 h timepoint in the upper kidney  
835 and in the lower kidneys already within the first hours. The signal increases over time in the MM when the  
836 kidney grows. The green YFP signal indicates Wnt4-positive cells. Timelapse was captured with 0.5 h  
837 intervals, and the total follow-up time was 39 h.

838 **Movie 2. A representative time-lapse video of the ColXVIII KO aorta-gonad-mesonephros (AGM)**  
839 **culture.** The AGM is oriented horizontally, where the limbs are located in the right upper part of the imaged  
840 area. The kidney is formed on the right lower part of the imaged area in the end of the nephric duct. The YFP  
841 signal is detected in the MM of the forming kidney around 17-18 h timepoint and the signal increases in the  
842 MM over time when the kidney grows. The green YFP signal indicates Wnt4-positive cells. Time-lapse was  
843 captured with 0.5 h intervals, and the total follow-up time was 39 h.

844 **Movie 3. Example of one nephrogenic niche showing Six2-positive cells in a cap mesenchyme of an E15.5**  
845 **kidney.** The kidney cortex was imaged through with the multiphoton microscope, and Six2-positive cells in  
846 each niche were calculated using a computer program designed for this purpose. The program marks every  
847 calculated cell by different colored circles through the stacks and, thus, calculates each cell separately. The  
848 cell count comes out in a separate text file in addition to the movie that it produces about the calculation.
